# Supplementary material for: Isolation and Structure Identification of Novel Brominated Diketopiperazines from Nocardia ignorata—A Lichen-Associated Actinobacterium
Source: PubMed Central journal article supplement (PMC6155340; doi:10.3390/molecules22030371), 2017-02-28
Supplement: molecules-22-00371-s001.pdf [file molecules-22-00371-s001.pdf]

# Isolation and Structure Identification of Novel Brominated Diketopiperazines from *Nocardia ignorata*—A Lichen-Associated Actinobacterium

Alba Noël <sup>1</sup>, Solenn Ferron <sup>1</sup>, Isabelle Rouaud <sup>1</sup>, Nicolas Gouault <sup>1</sup>, Jean-Pierre Hurvois <sup>1</sup> and Sophie Tomasi <sup>1,\*</sup>

<sup>1</sup> CORINT, UMR CNRS ISCR 6226, UFR Sciences Pharmaceutiques et Biologiques, Université Bretagne Loire, 2 Av. du Professeur Léon Bernard, 35043 Rennes, France;

\* Correspondence: sophie.tomasi@univ-rennes1.fr; Tel.: +33-223-234-817

## Supplementary material

|                                                                                                                |    |
|----------------------------------------------------------------------------------------------------------------|----|
| Figure S1: <sup>1</sup> H-NMR spectrum of compound 1 in CD <sub>3</sub> OD .....                               | 2  |
| Figure S2: <sup>1</sup> H-NMR spectrum of compound 2 in CD <sub>3</sub> OD .....                               | 3  |
| Figure S3 : <sup>1</sup> H-NMR spectrum of compound 3 in CD <sub>3</sub> OD .....                              | 4  |
| Figure S4: <sup>1</sup> H-NMR spectrum of compound 4 in CDCl <sub>3</sub> .....                                | 5  |
| Figure S5: <sup>1</sup> H-NMR spectrum of compound 5 in CDCl <sub>3</sub> .....                                | 6  |
| Figure S6: <sup>1</sup> H-NMR spectrum of compound 6 in CD <sub>3</sub> OD .....                               | 7  |
| Figure S7: <sup>13</sup> C-NMR spectrum of compound 6 in CD <sub>3</sub> OD .....                              | 8  |
| Figure S8 : HMBC spectrum of compound 6 in CD <sub>3</sub> OD .....                                            | 9  |
| Figure S9: <sup>1</sup> H-NMR spectrum of compound 6 in pyridine-d <sub>5</sub> .....                          | 10 |
| Figure S10 : HMBC spectrum of compound 6 in pyridine-d <sub>5</sub> .....                                      | 11 |
| Figure S11 : NOESY spectrum of compound 6 in pyridine-d <sub>5</sub> .....                                     | 12 |
| Figure S12: <sup>1</sup> H-NMR spectrum of compound 7 in CD <sub>3</sub> OD .....                              | 13 |
| Figure S13: <sup>13</sup> C-NMR spectrum of compound 7 in CD <sub>3</sub> OD.....                              | 14 |
| Figure S14: HSQC spectrum of compound 7 in CD <sub>3</sub> OD .....                                            | 15 |
| Figure S15: COSY spectrum of compound 7 in CD <sub>3</sub> OD.....                                             | 16 |
| Figure S16: HMBC spectrum of compound 7 in CD <sub>3</sub> OD .....                                            | 17 |
| Figure S17: <sup>1</sup> H-NMR spectrum of compound 7 in acetone-d <sub>6</sub> .....                          | 18 |
| Figure S18 : HMBC spectrum of compound 7 in acetone-d <sub>6</sub> .....                                       | 19 |
| Figure S19: NOESY spectrum of compound 7 in acetone-d <sub>6</sub> .....                                       | 20 |
| Figure S20: <sup>1</sup> H-NMR spectrum of compound 8 in CD <sub>3</sub> OD .....                              | 21 |
| Figure S21: <sup>1</sup> H-NMR spectrum of compound 10 in DMSO-d <sub>6</sub> .....                            | 22 |
| Figure S22: <sup>1</sup> H-NMR spectrum of compound 11 in CDCl <sub>3</sub> .....                              | 23 |
| Figure S23: <sup>1</sup> H-NMR spectrum of compound 13a in CDCl <sub>3</sub> .....                             | 24 |
| Figure S24: <sup>13</sup> C-NMR spectrum of compound 13a in CDCl <sub>3</sub> .....                            | 25 |
| Figure S25: <sup>1</sup> H-NMR spectrum of compound 13b in CDCl <sub>3</sub> .....                             | 26 |
| Figure S26: <sup>13</sup> C-NMR spectrum of compound 13b in CDCl <sub>3</sub> .....                            | 27 |
| Figure S27: HPLC chromatogram at 220 nm of isolated (blue) and synthetic (red) compounds 6 (a) and 7 (b) ..... | 28 |

S1

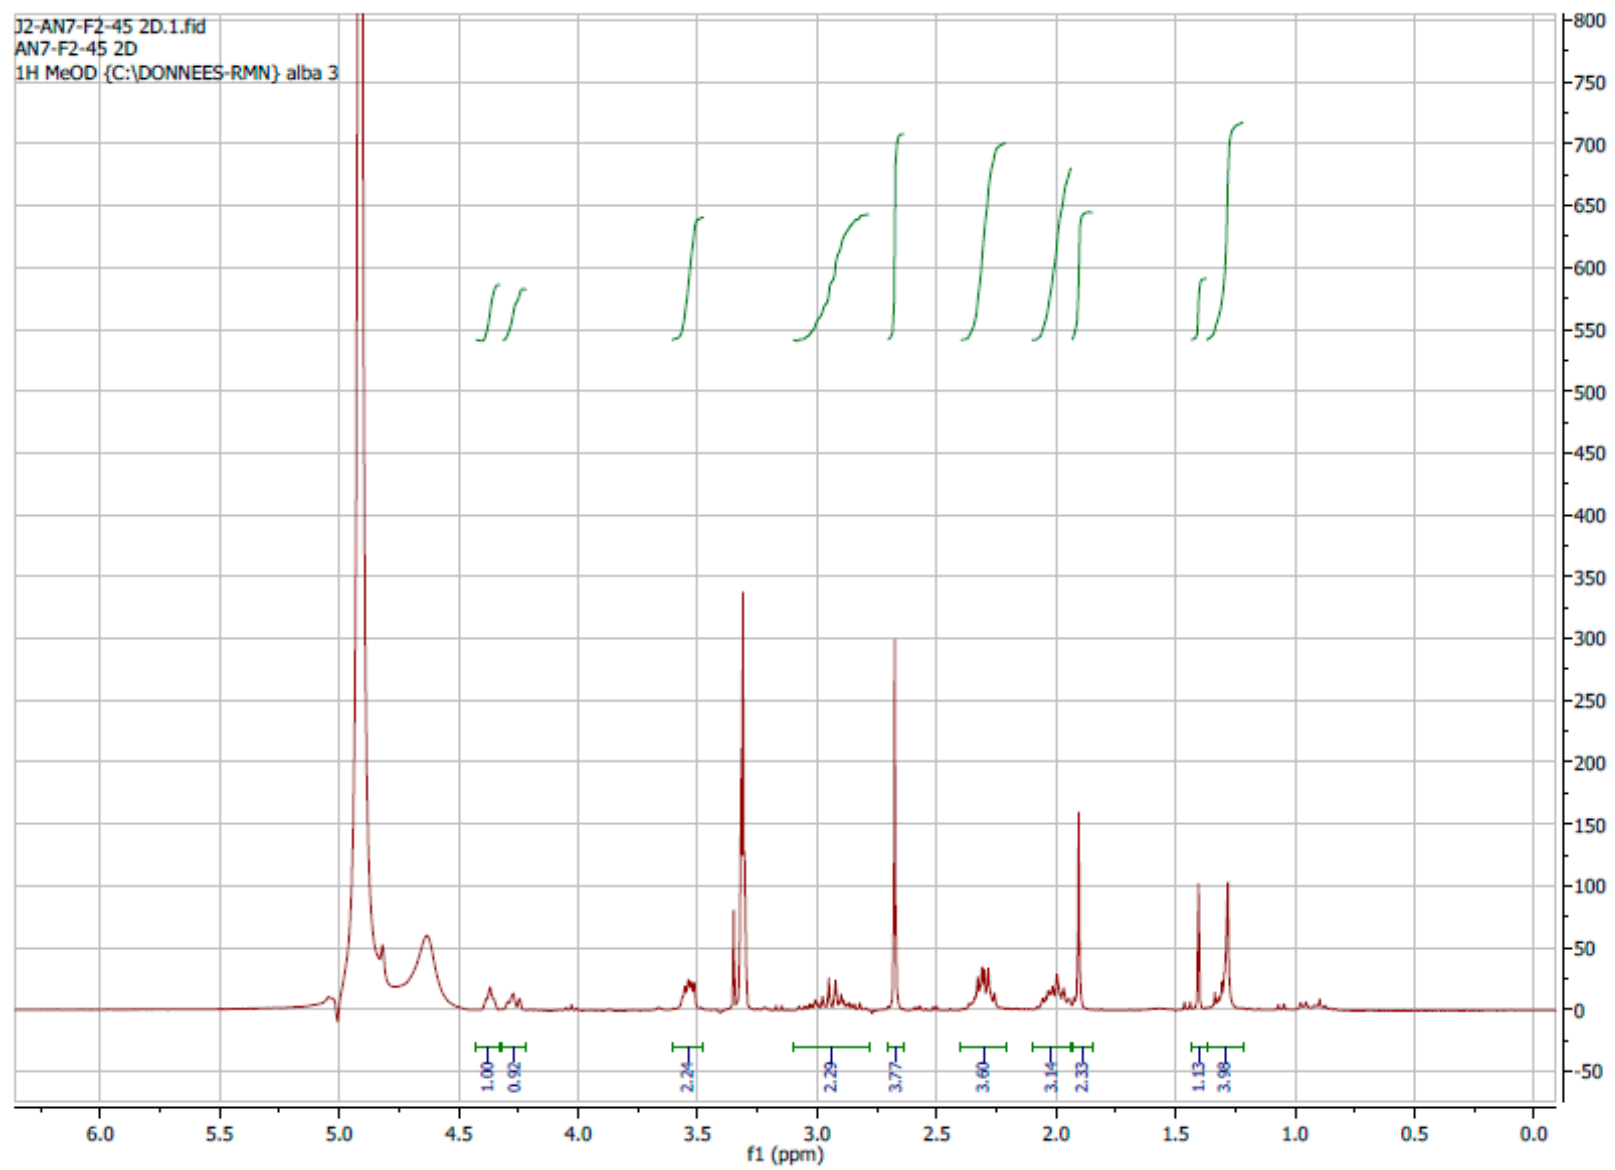

Figure S1:  $^1\text{H}$ -NMR spectrum of compound 1 in  $\text{CD}_3\text{OD}$ .

S2

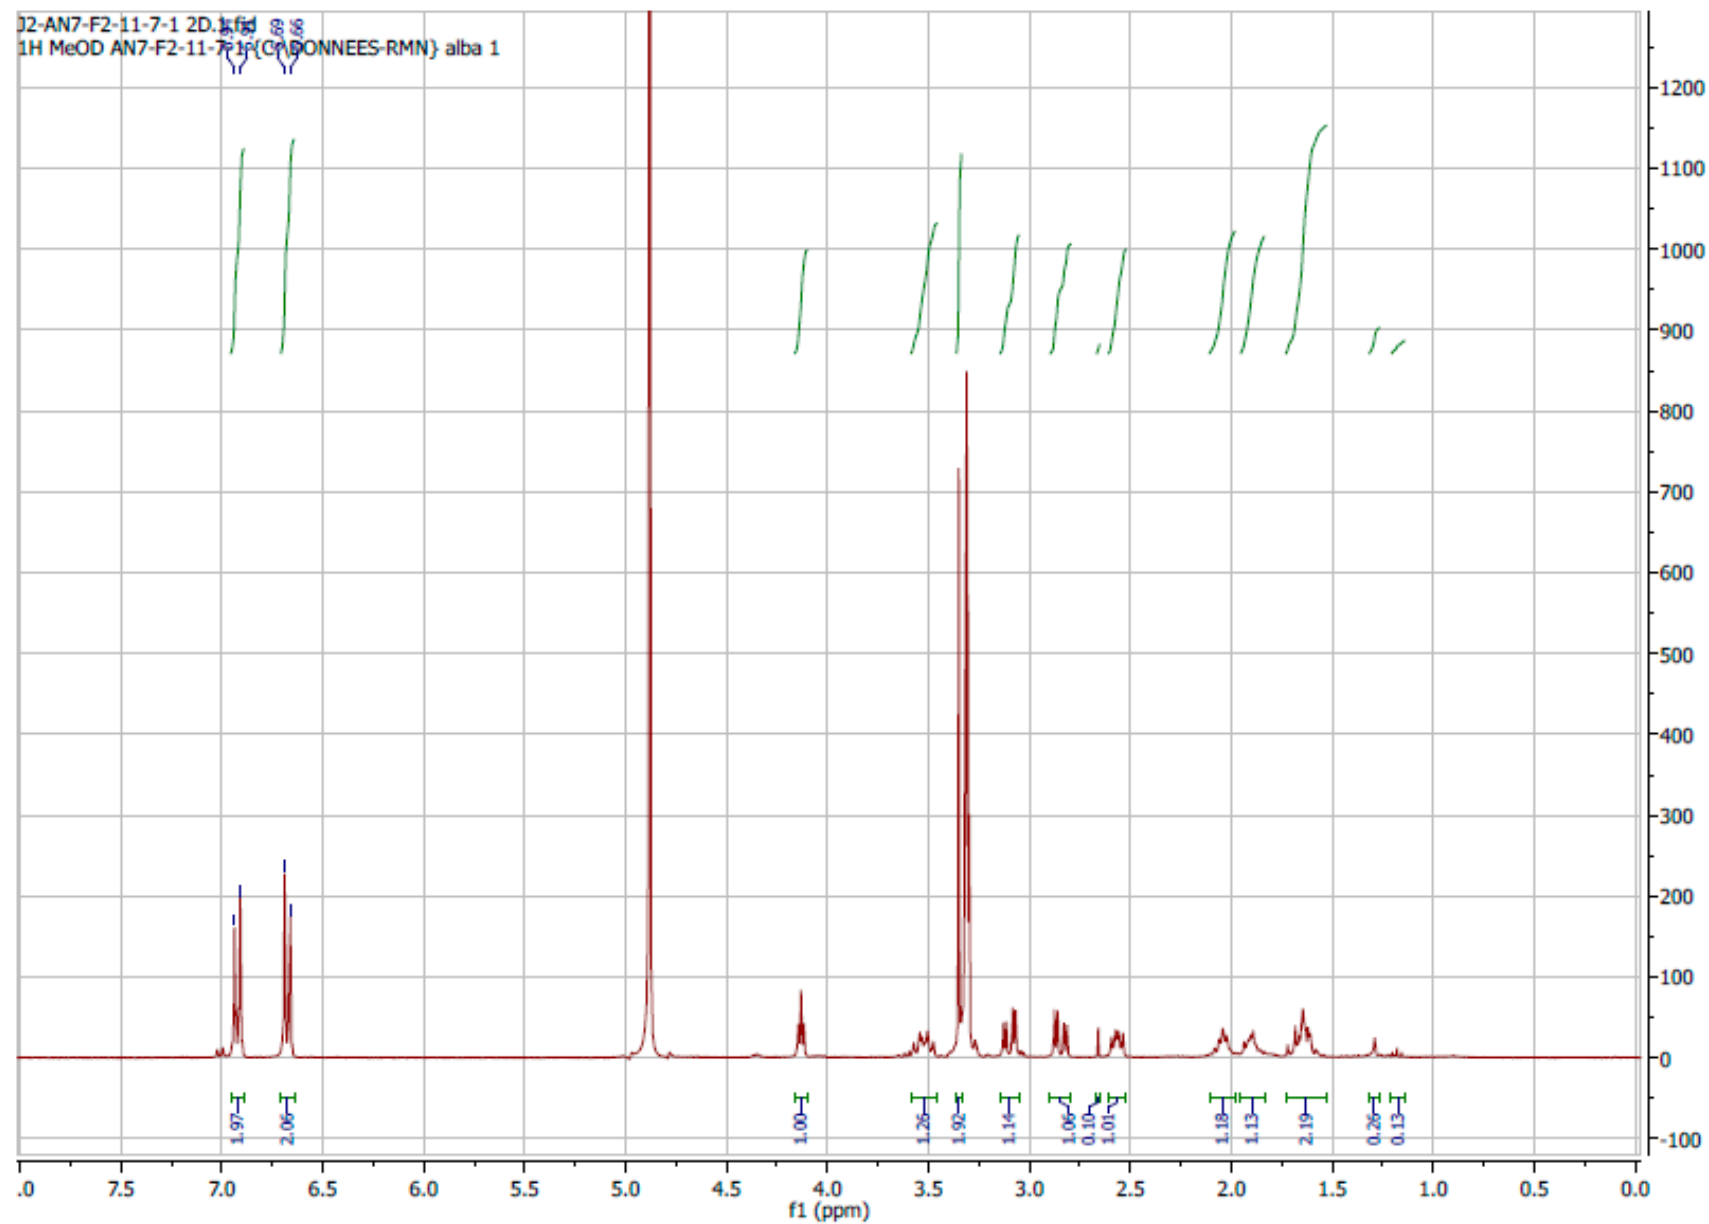

Figure S2: <sup>1</sup>H-NMR spectrum of compound 2 in CD<sub>3</sub>OD.

S3

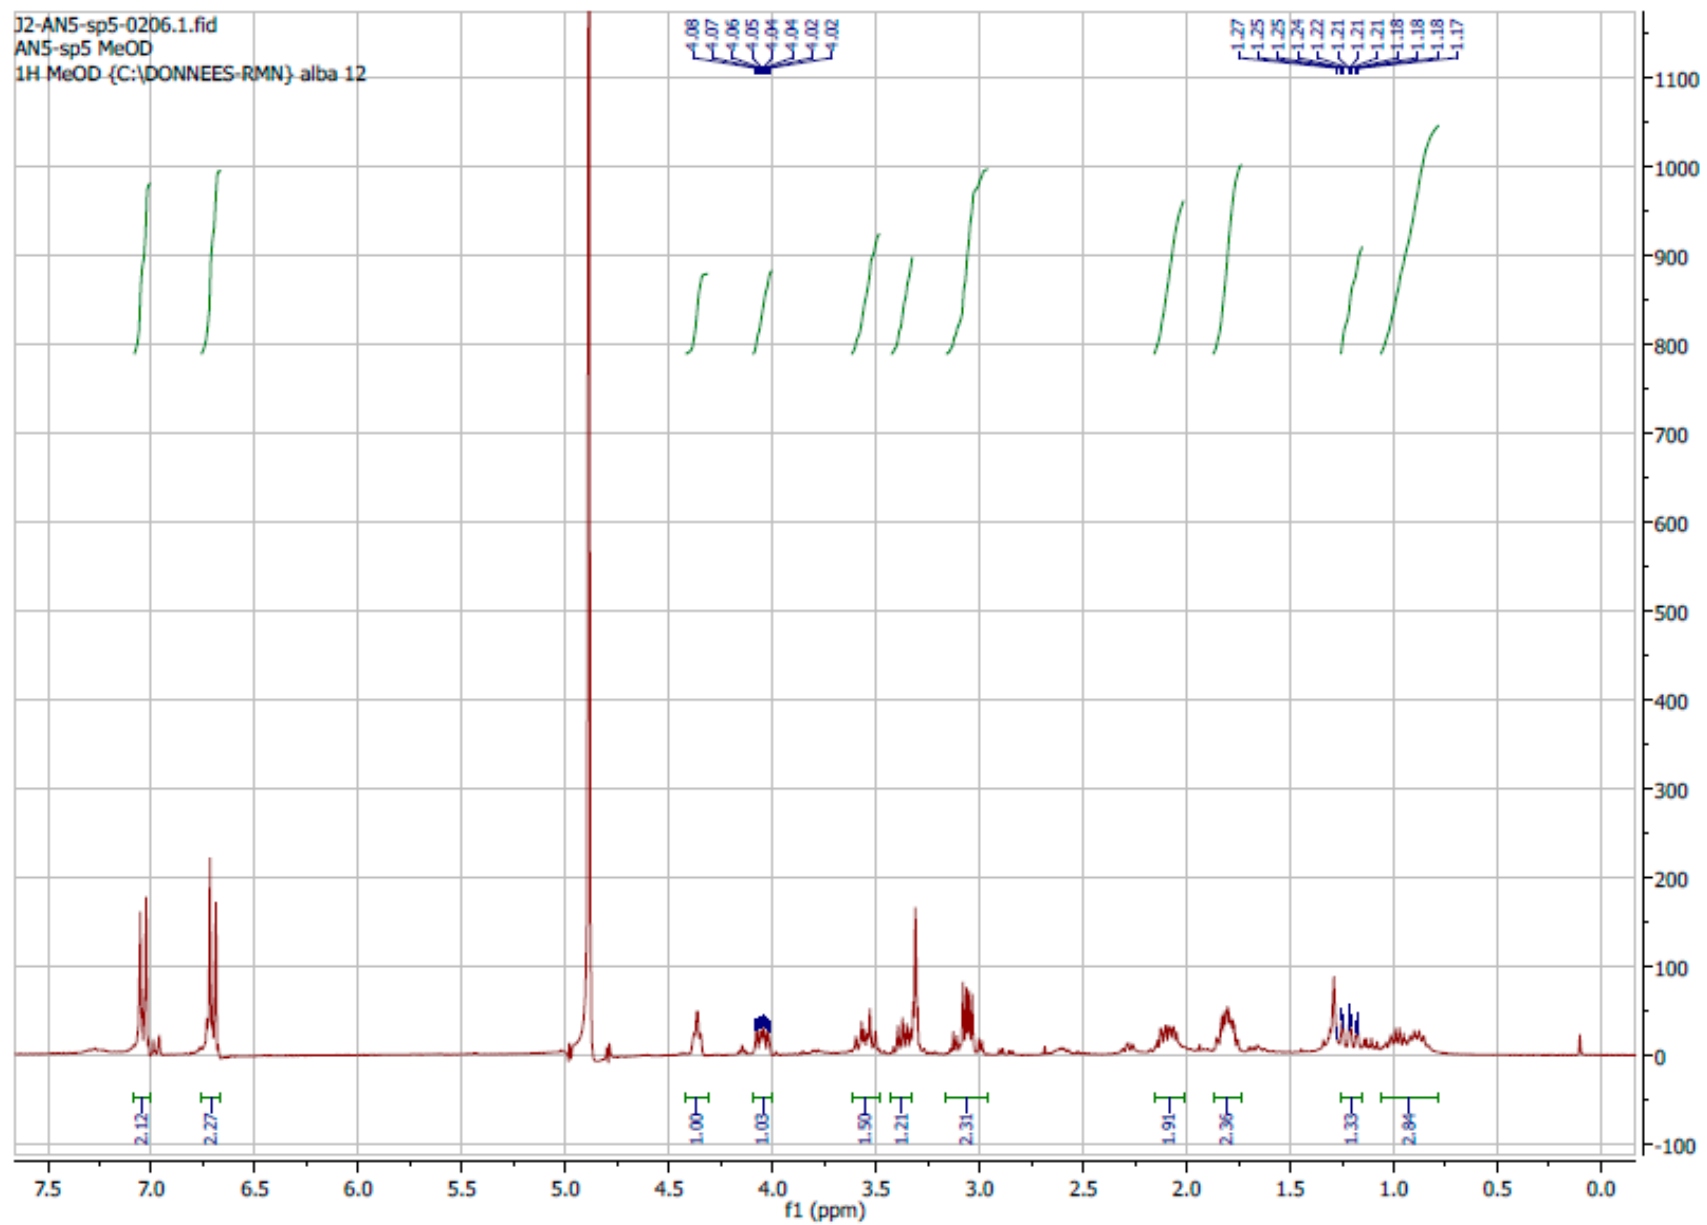

Figure S3 :  $^1\text{H}$ -NMR spectrum of compound 3 in  $\text{CD}_3\text{OD}$ .

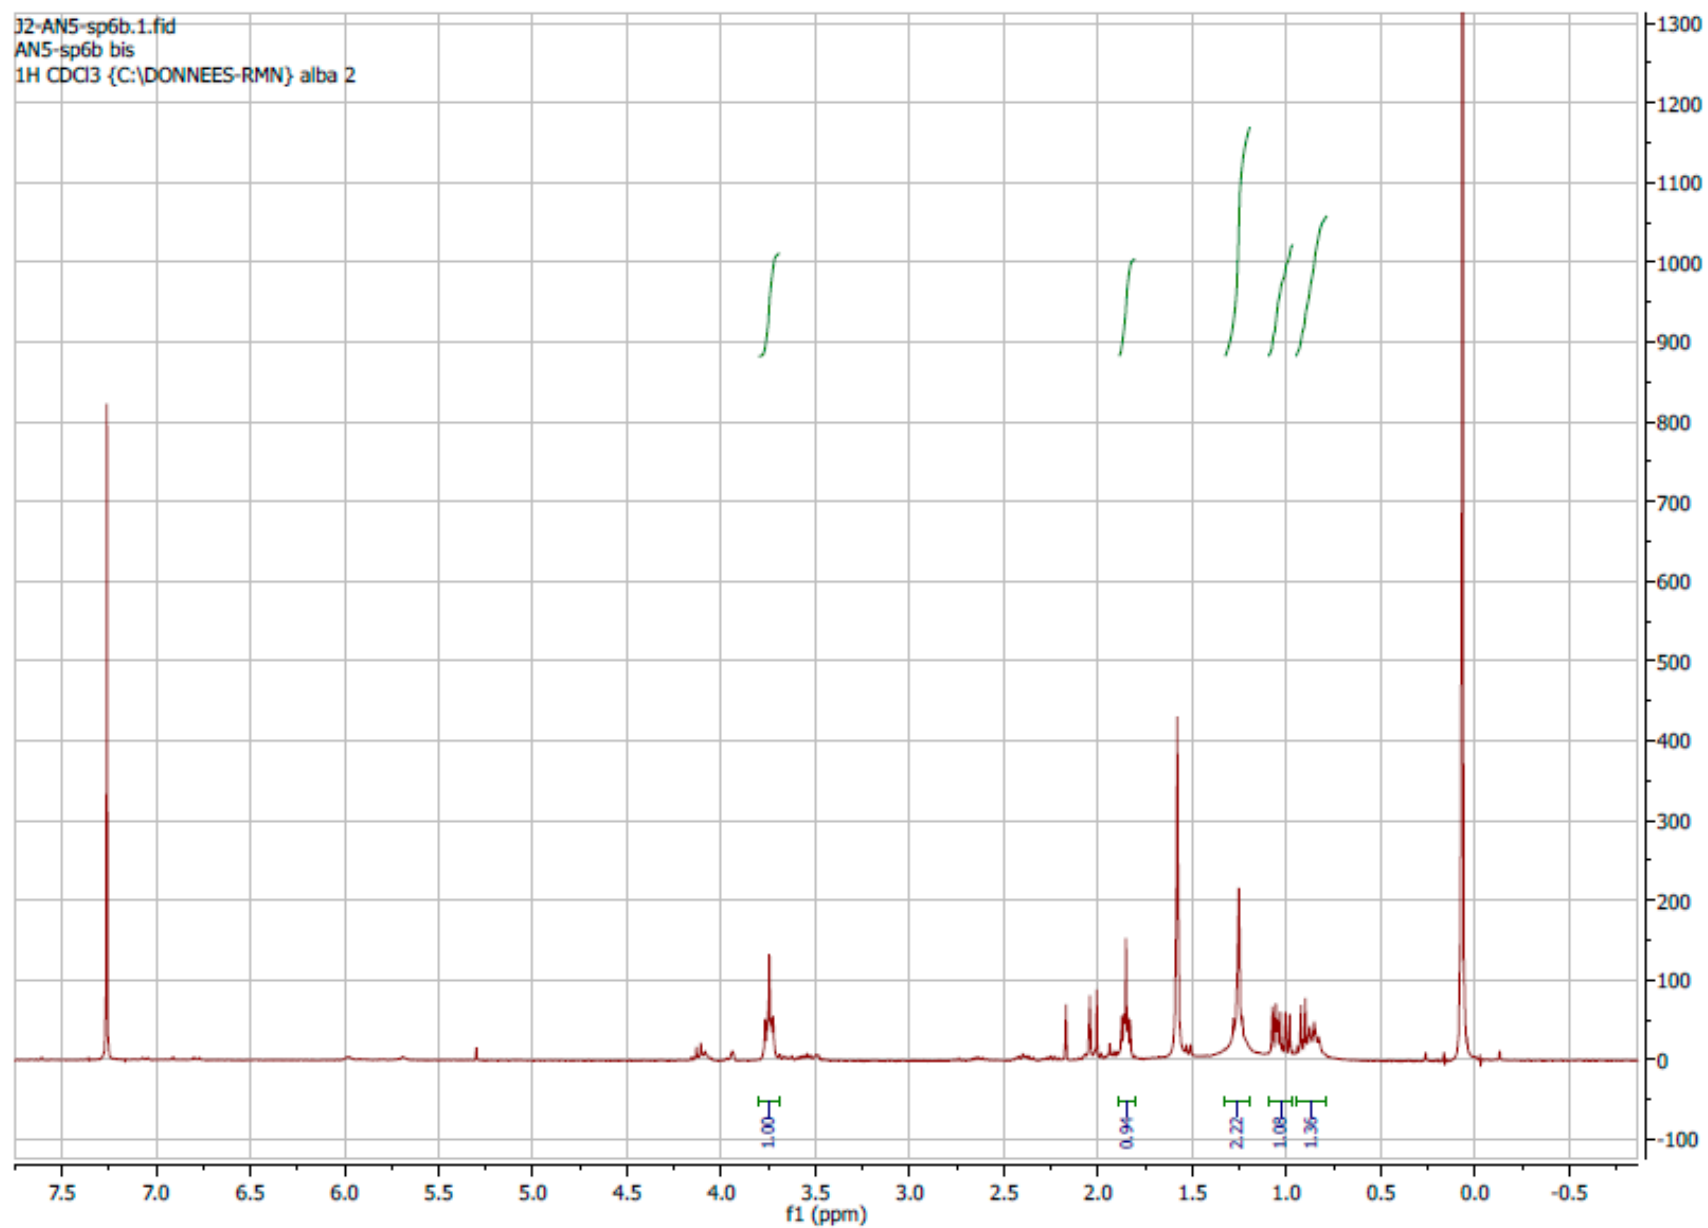

Figure S4:  $^1\text{H}$ -NMR spectrum of compound 4 in  $\text{CDCl}_3$ .

S5

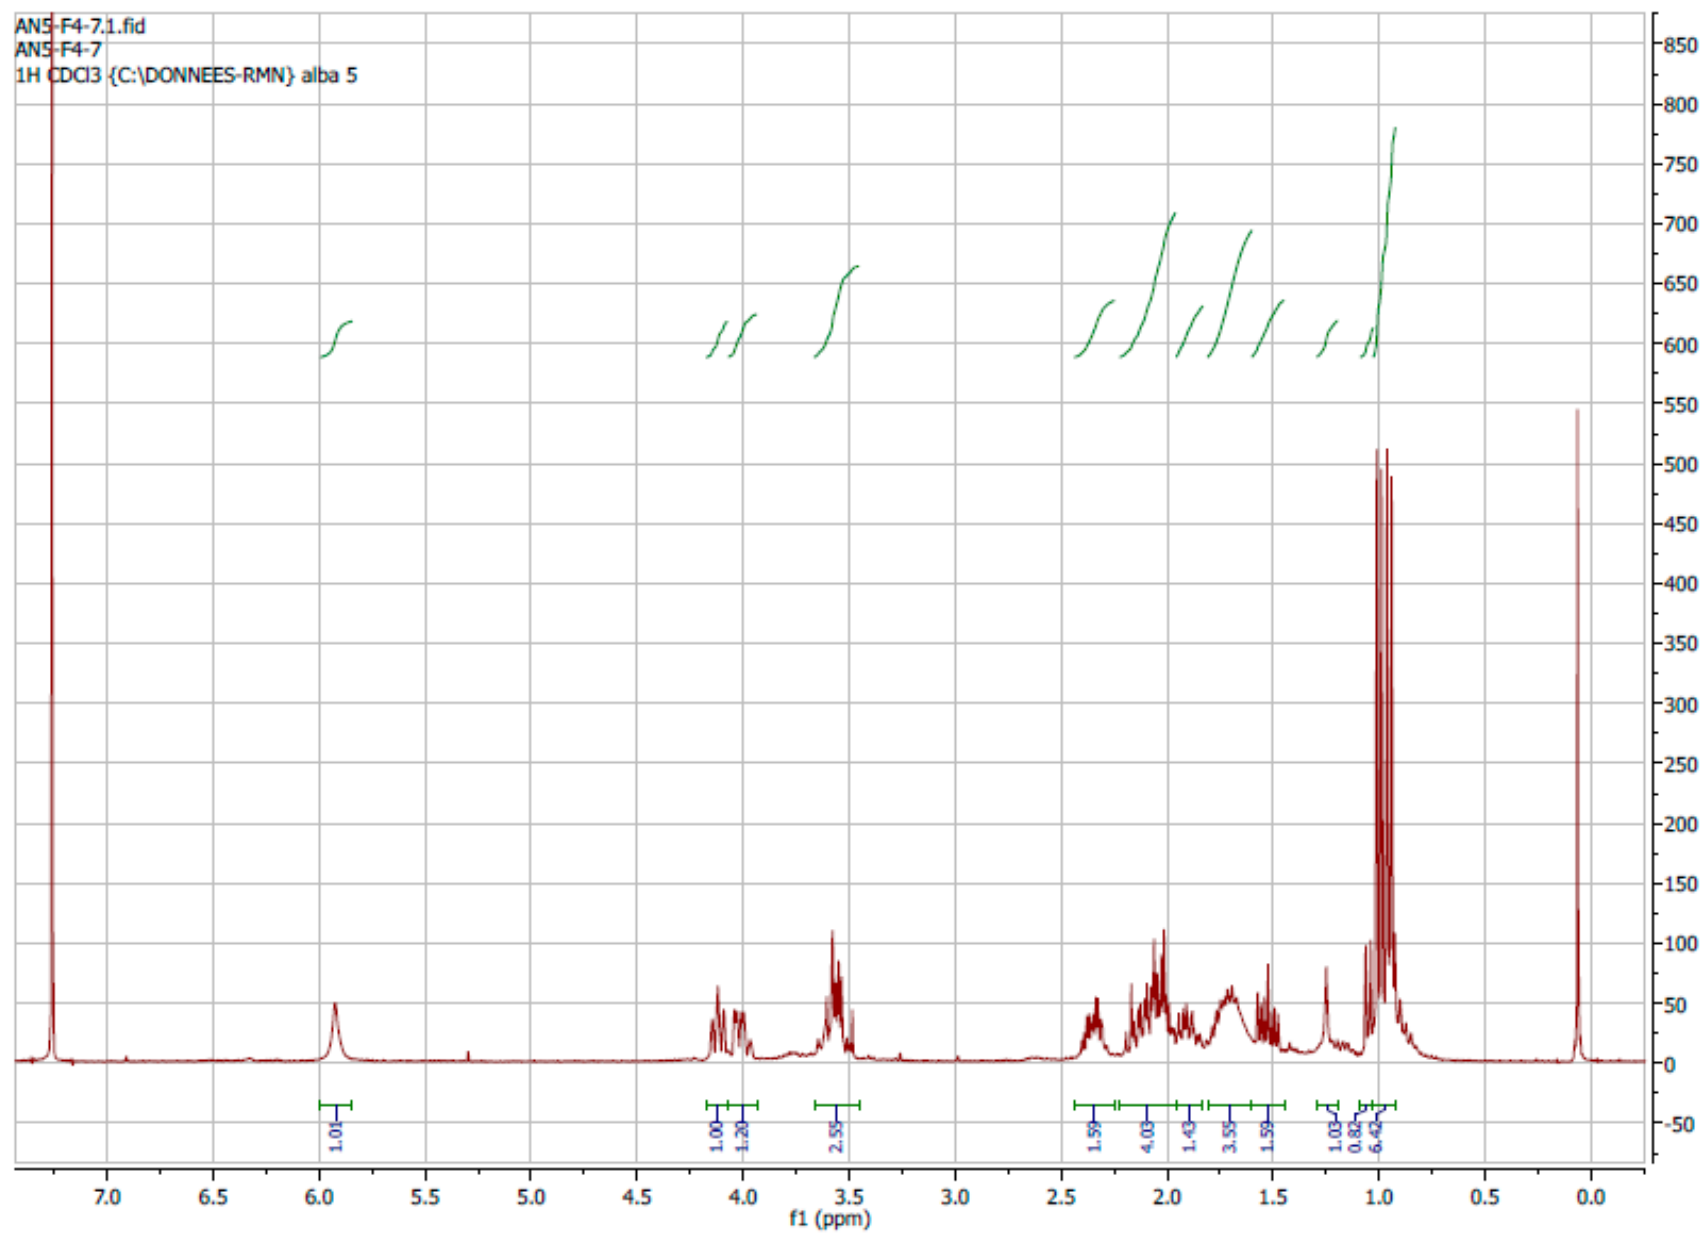

Figure S5:  $^1\text{H}$ -NMR spectrum of compound 5 in  $\text{CDCl}_3$ .

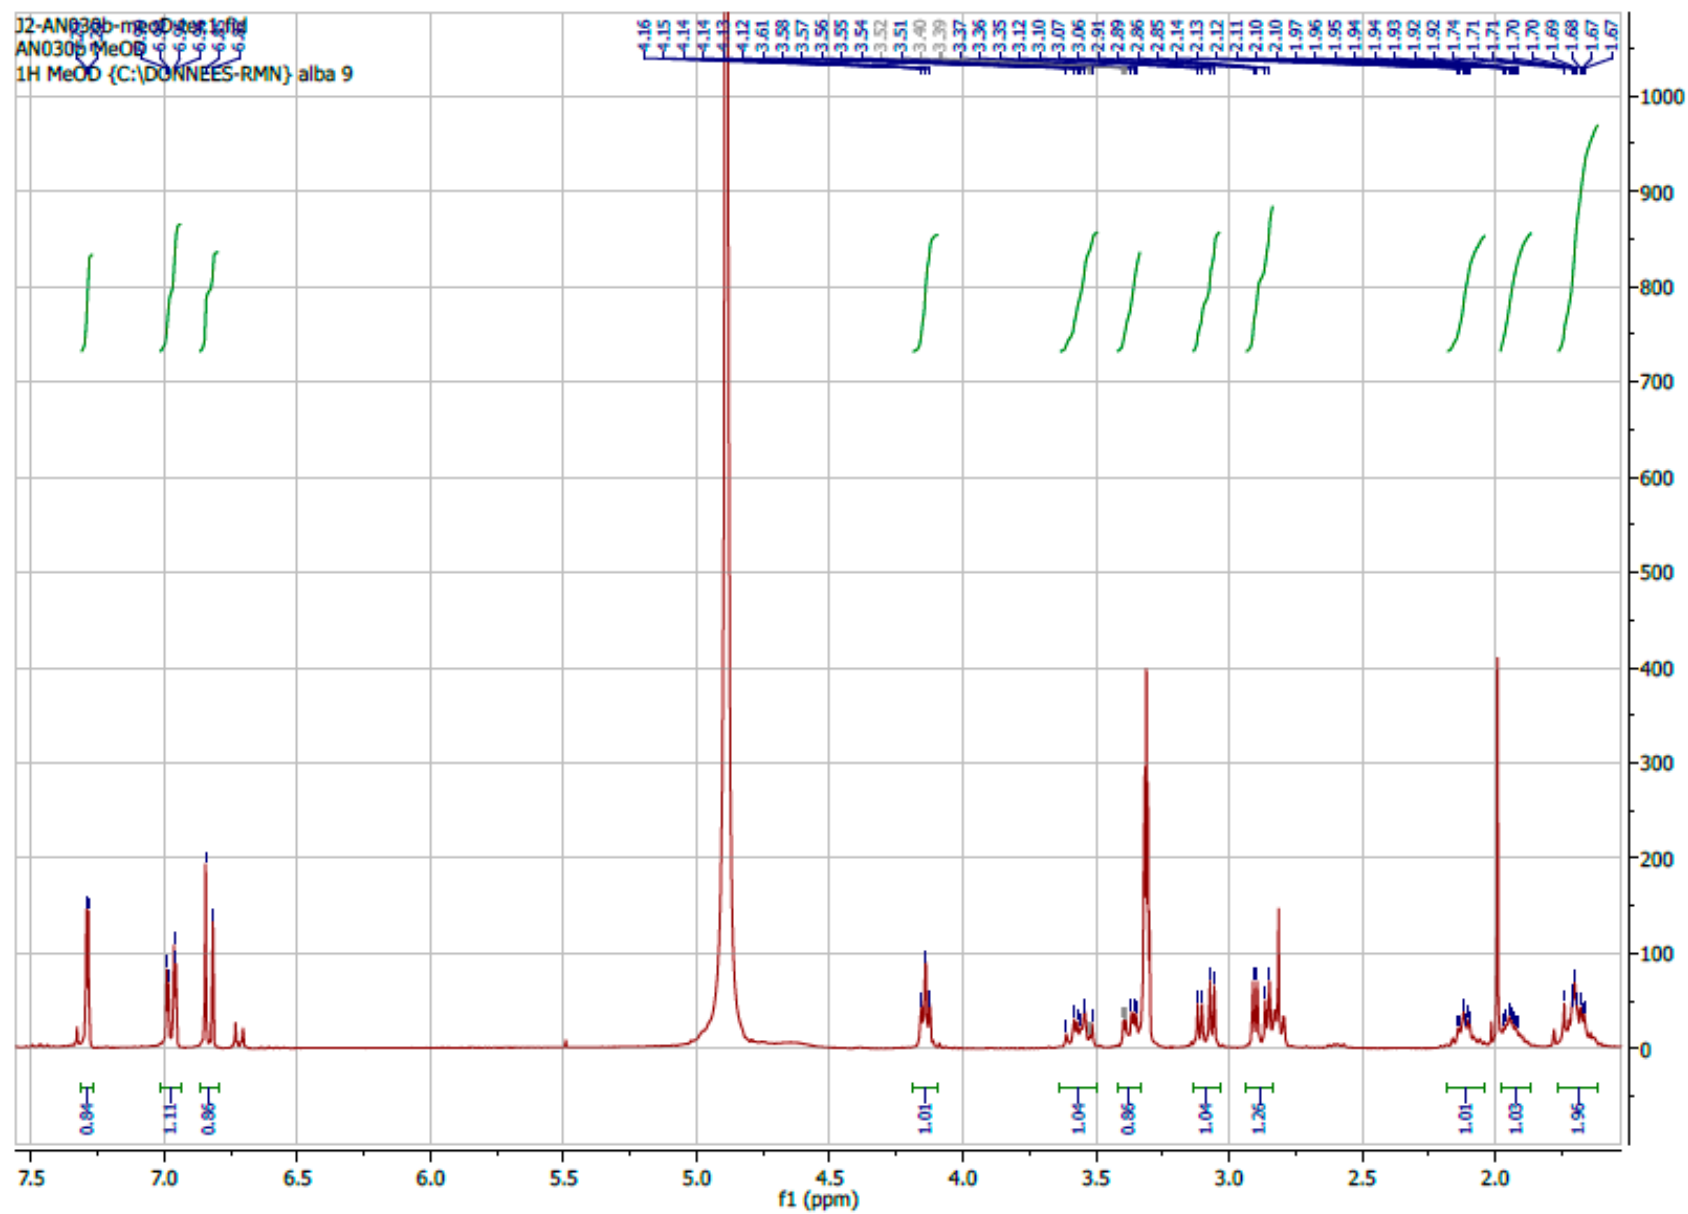

Figure S6:  $^1\text{H}$ -NMR spectrum of compound 6 in  $\text{CD}_3\text{OD}$ .

S7

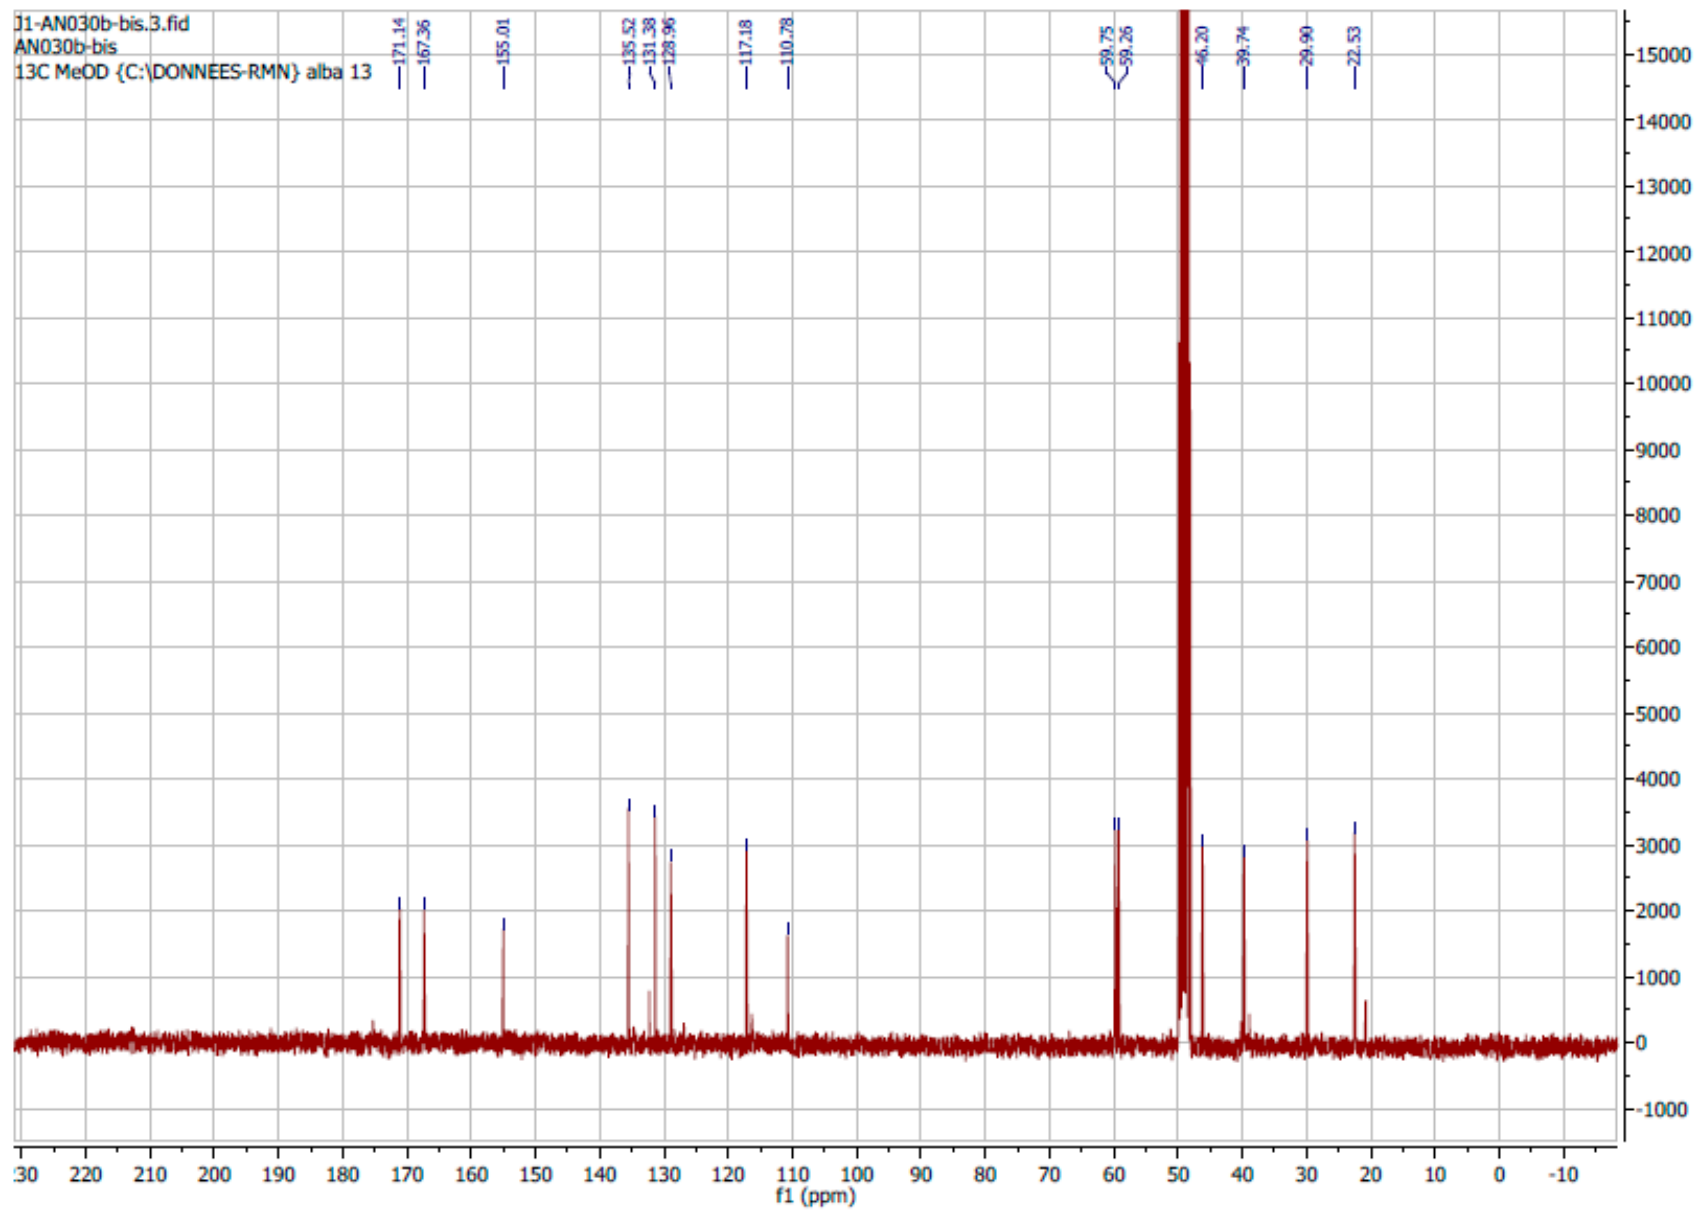

Figure S7: <sup>13</sup>C-NMR spectrum of compound 6 in CD<sub>3</sub>OD.



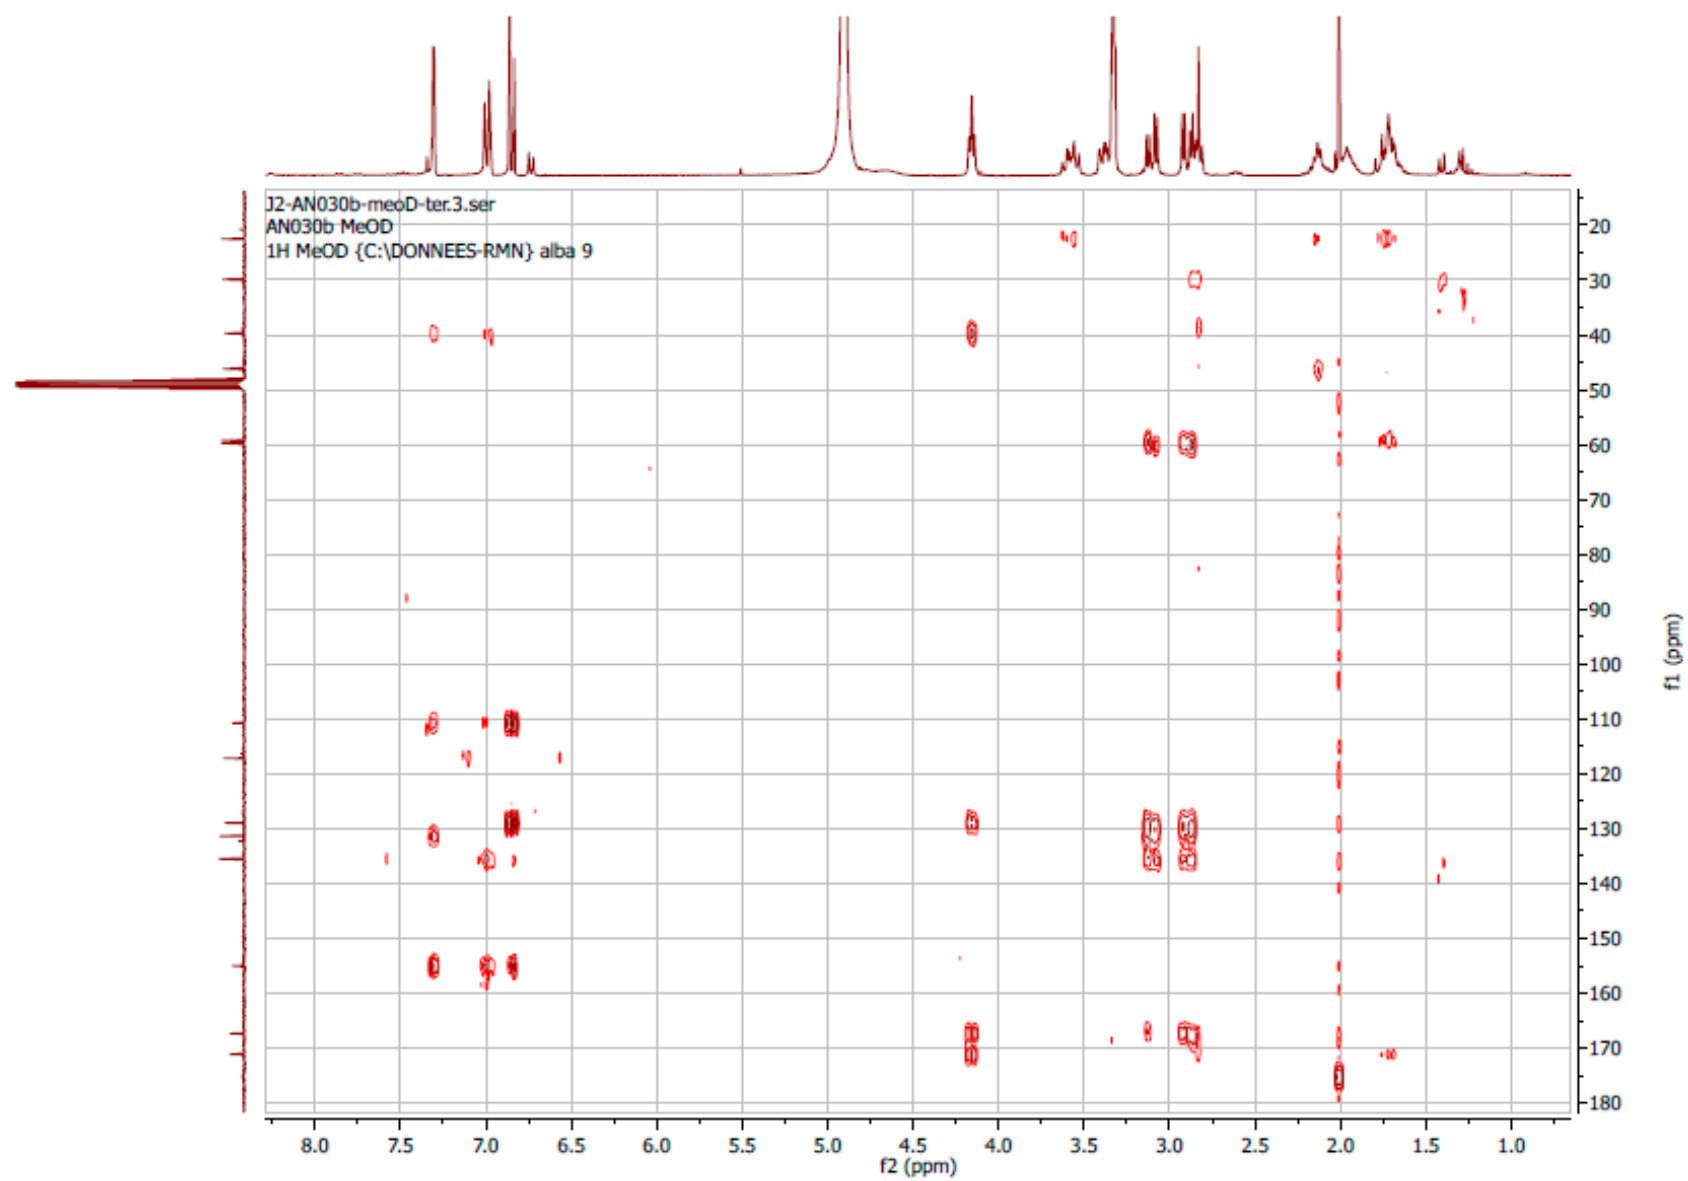

Figure S8 : HMBC spectrum of compound 6 in CD<sub>3</sub>OD.

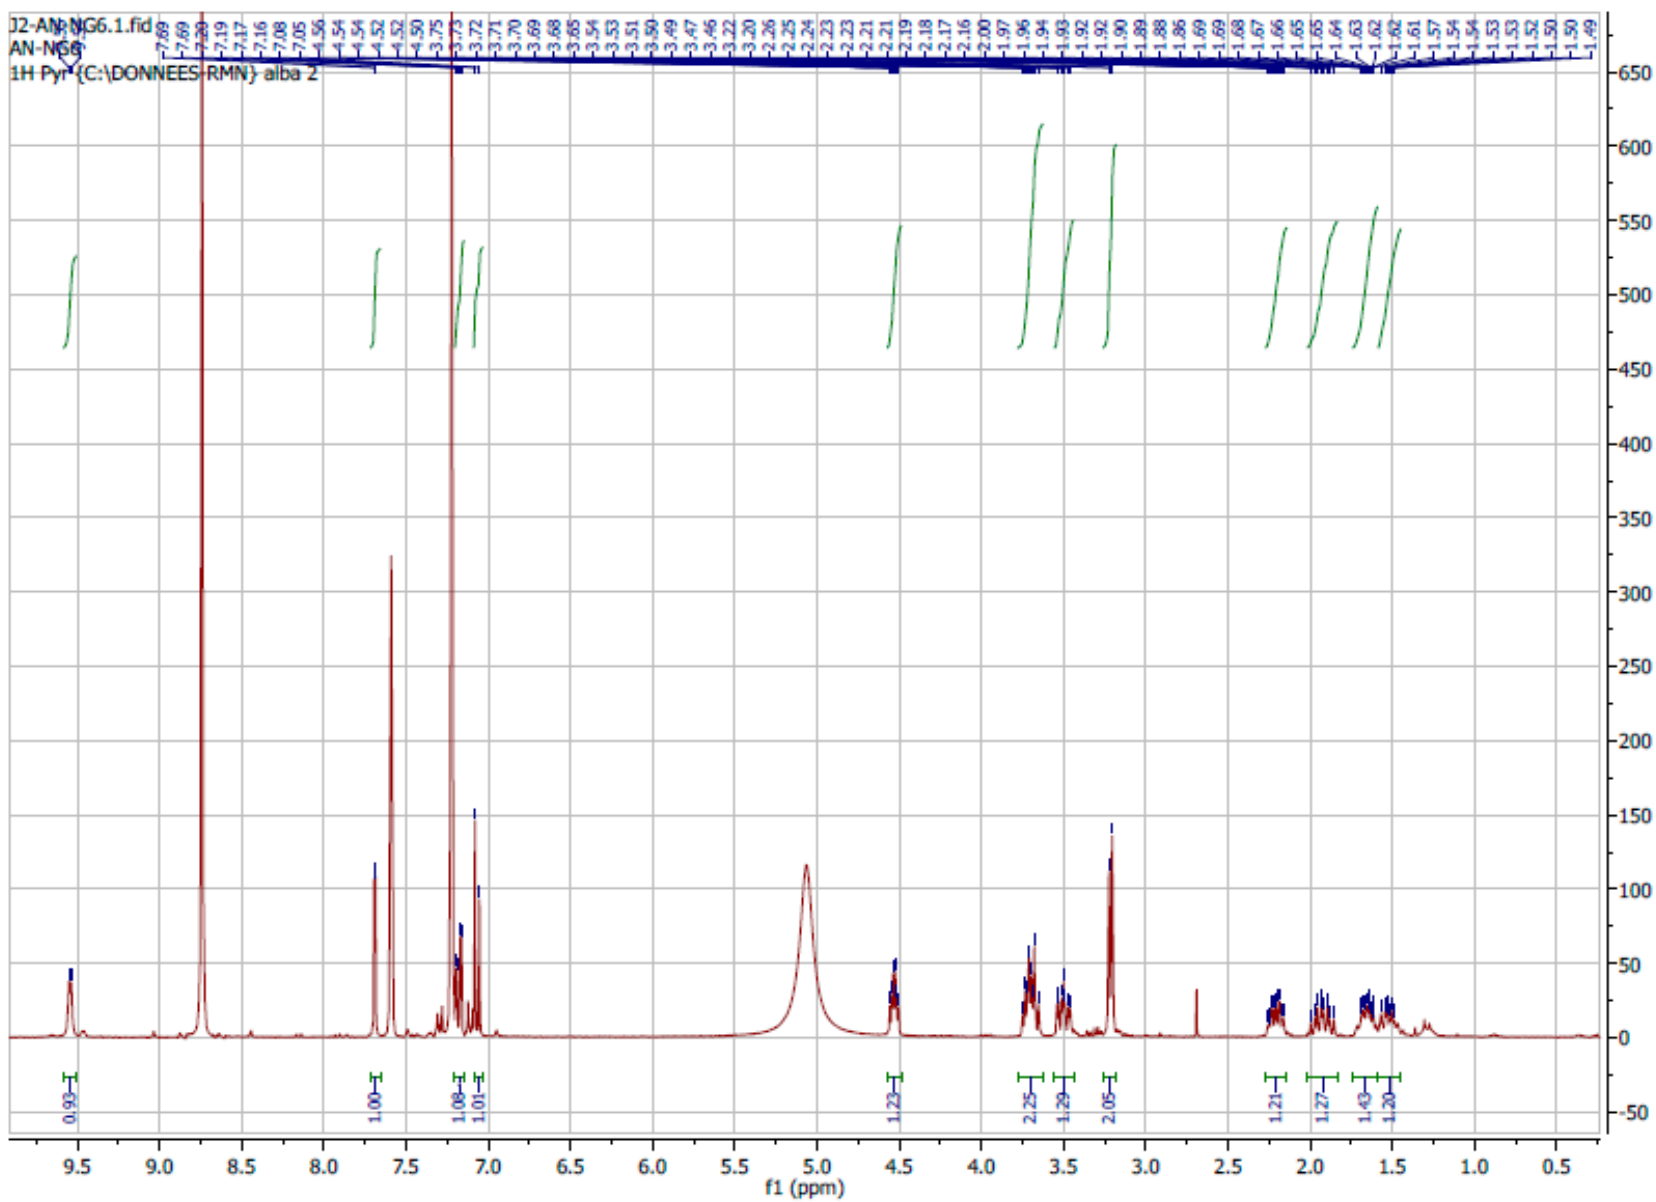

Figure S9:  $^1\text{H}$ -NMR spectrum of compound 6 in pyridine- $d_5$ .

S10

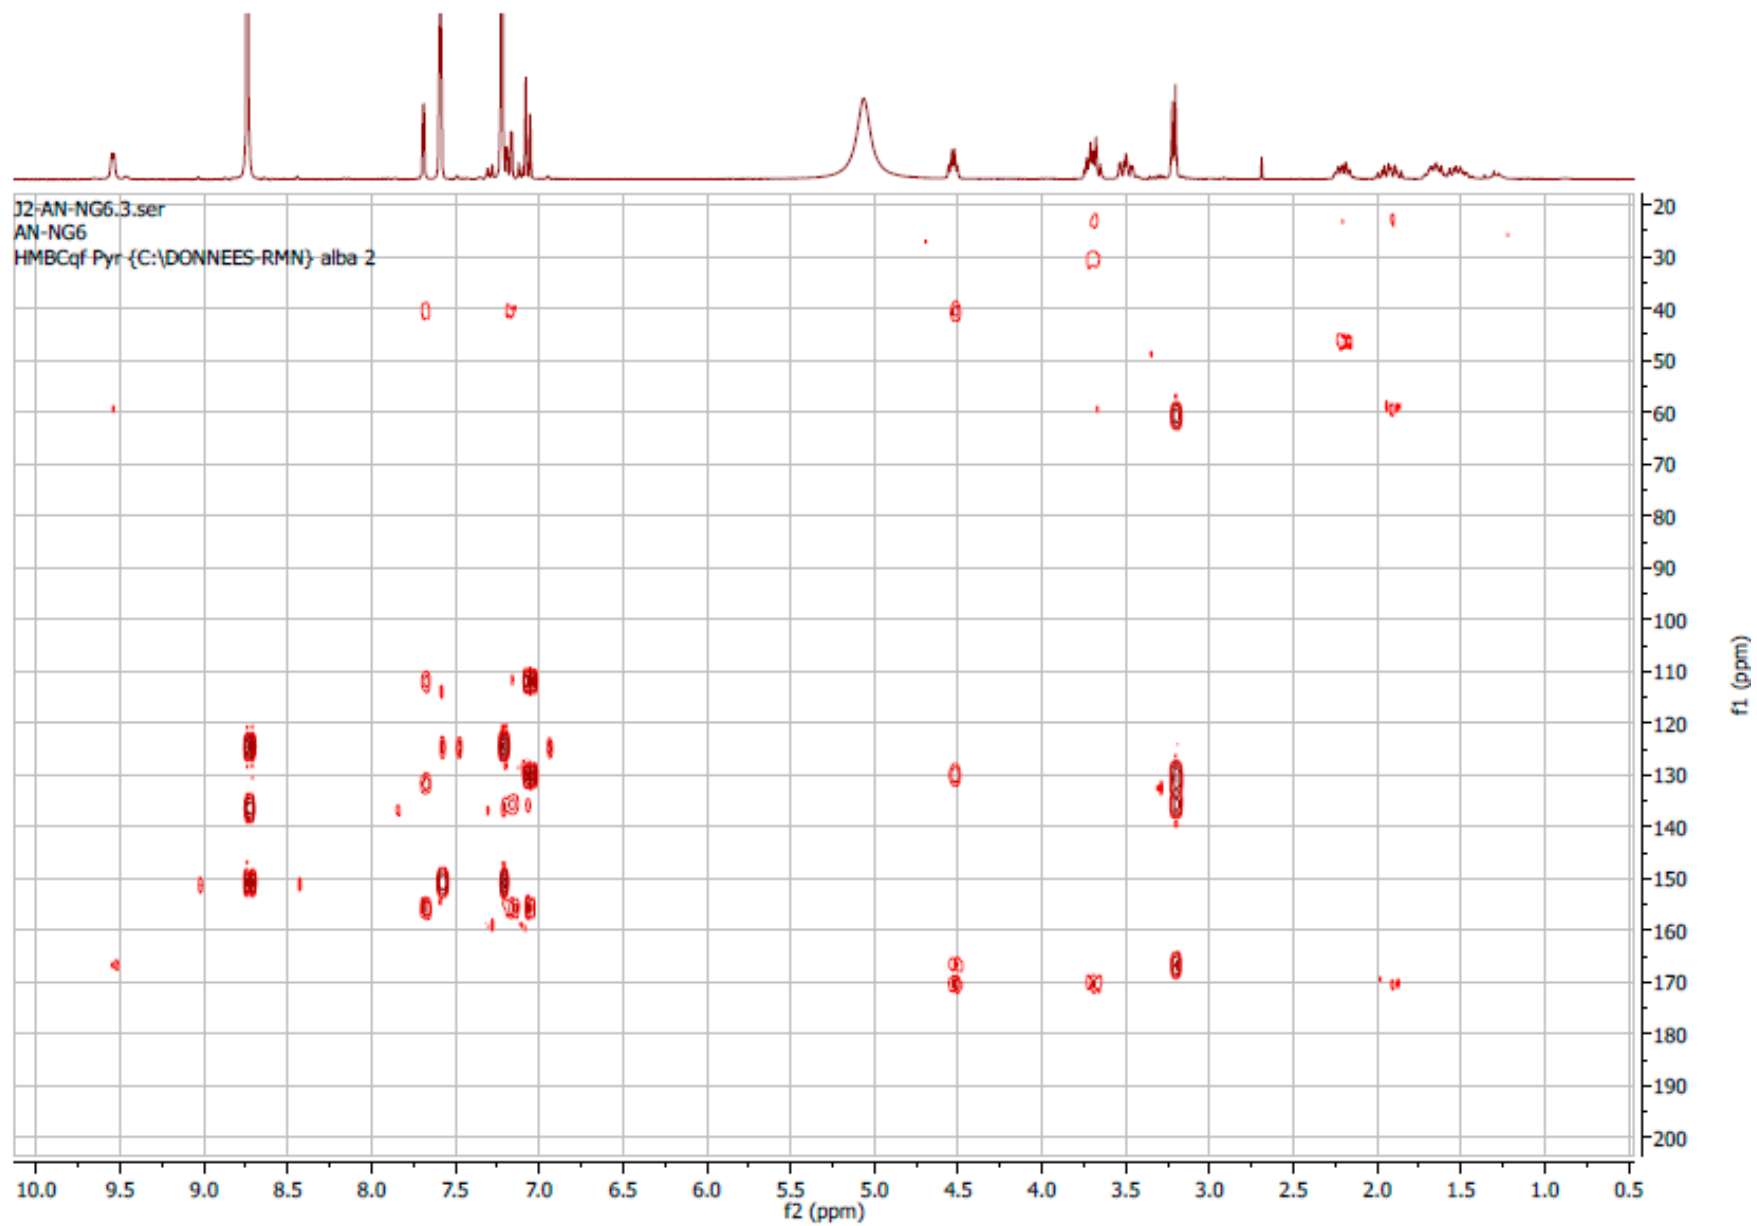

Figure S10 : HMBC spectrum of compound 6 in pyridine-*d*<sub>5</sub>.

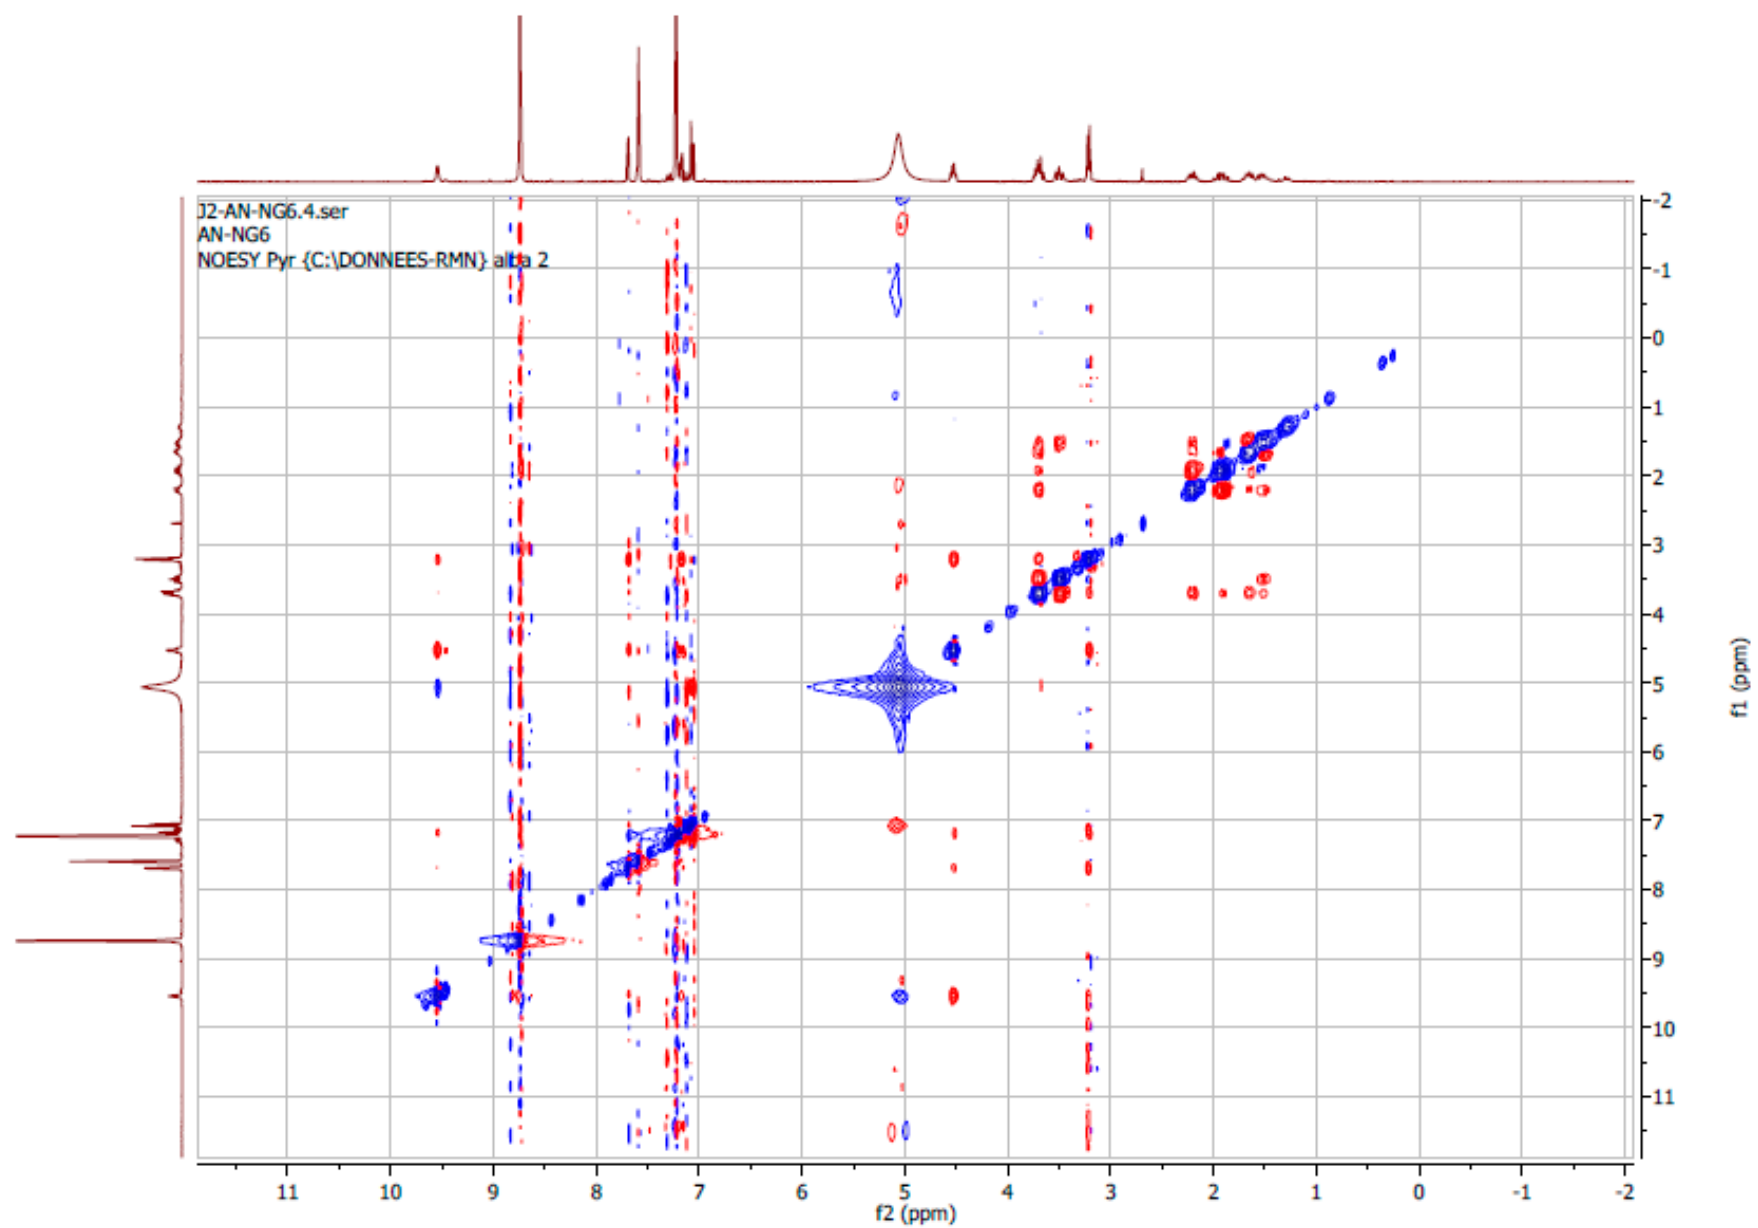

Figure S11 : NOESY spectrum of compound 6 in pyridine-*d*<sub>5</sub>.

S12

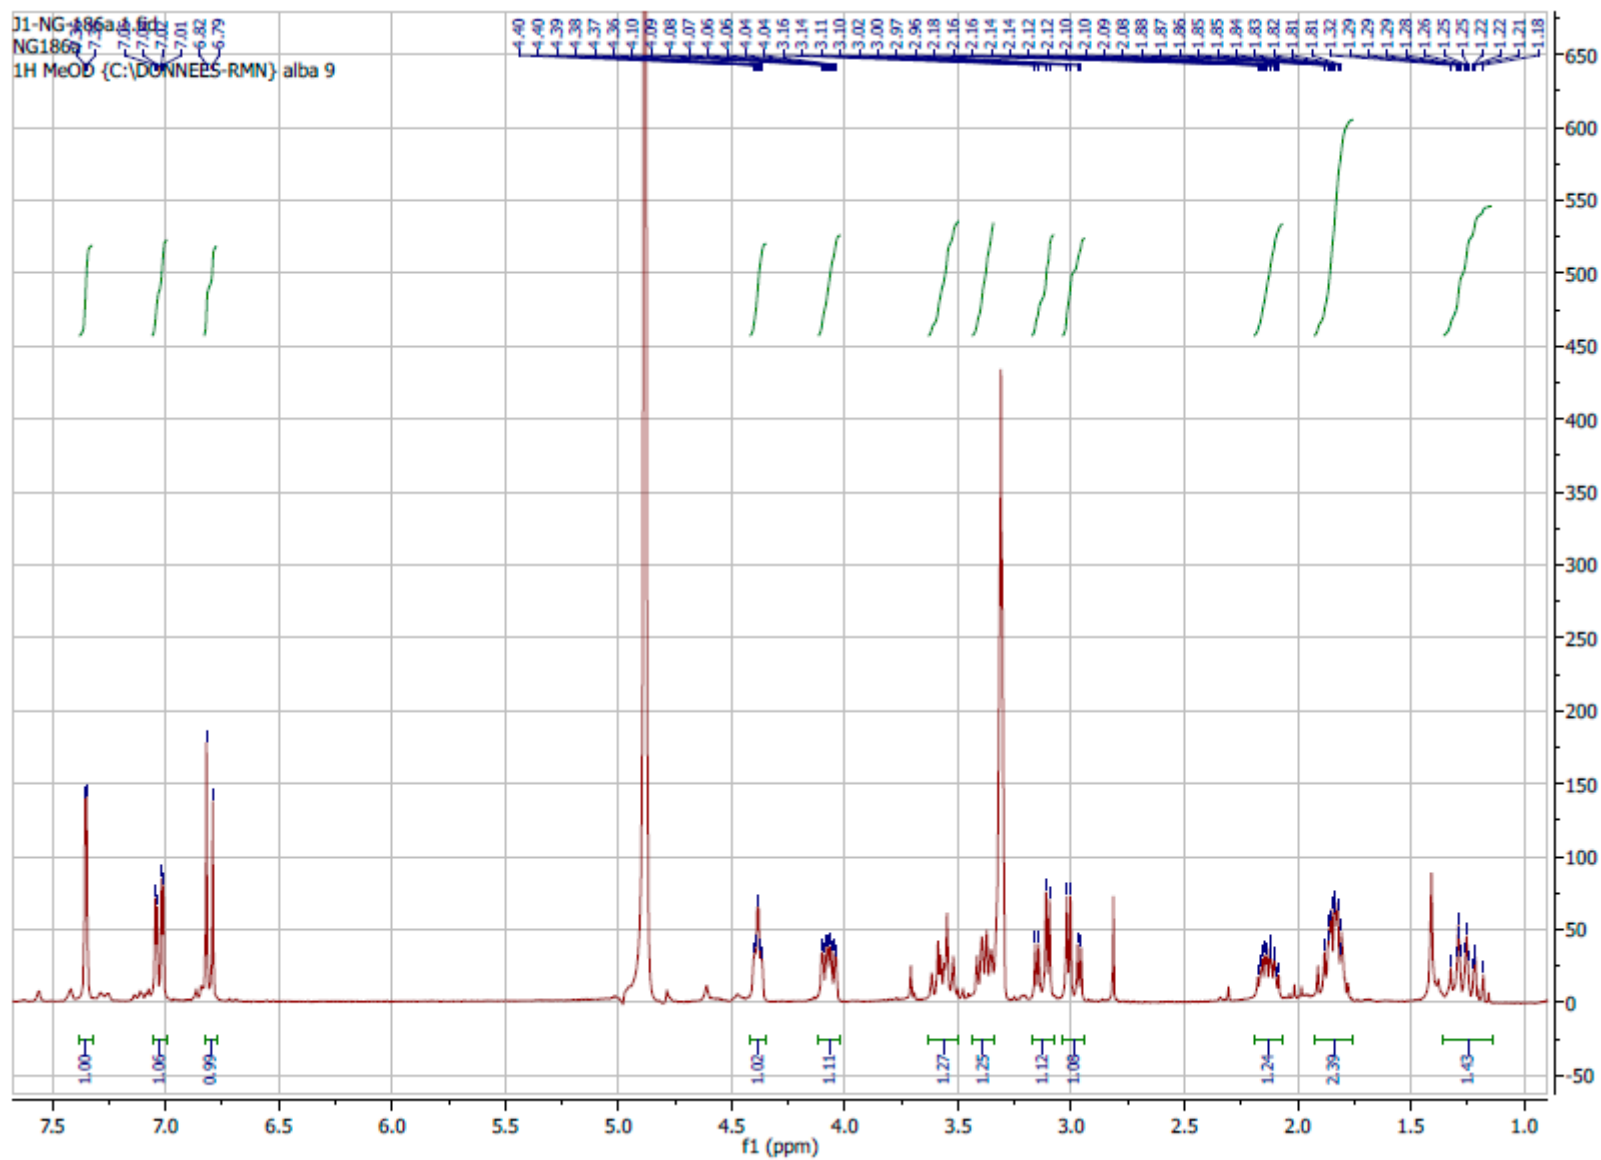

Figure S12:  $^1\text{H-NMR}$  spectrum of compound 7 in  $\text{CD}_3\text{OD}$ .

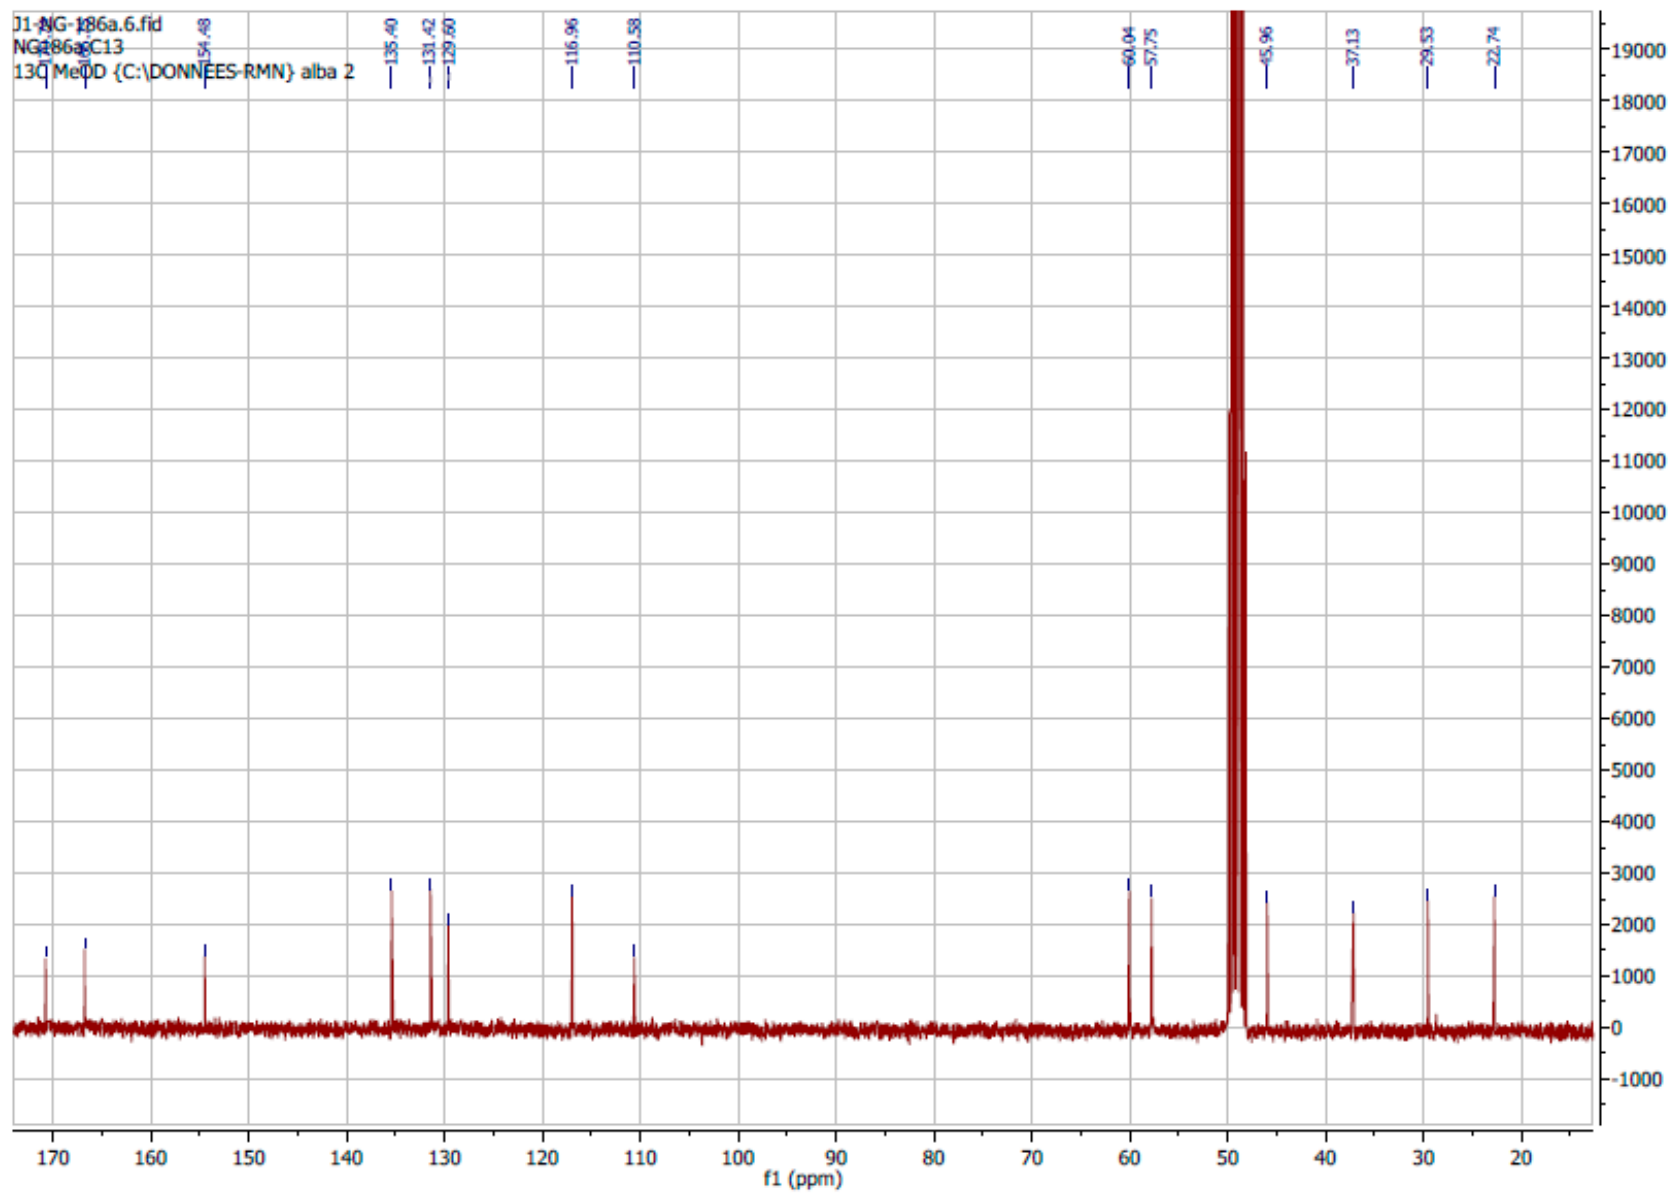

Figure S13:  $^{13}\text{C}$ -NMR spectrum of compound 7 in  $\text{CD}_3\text{OD}$ .

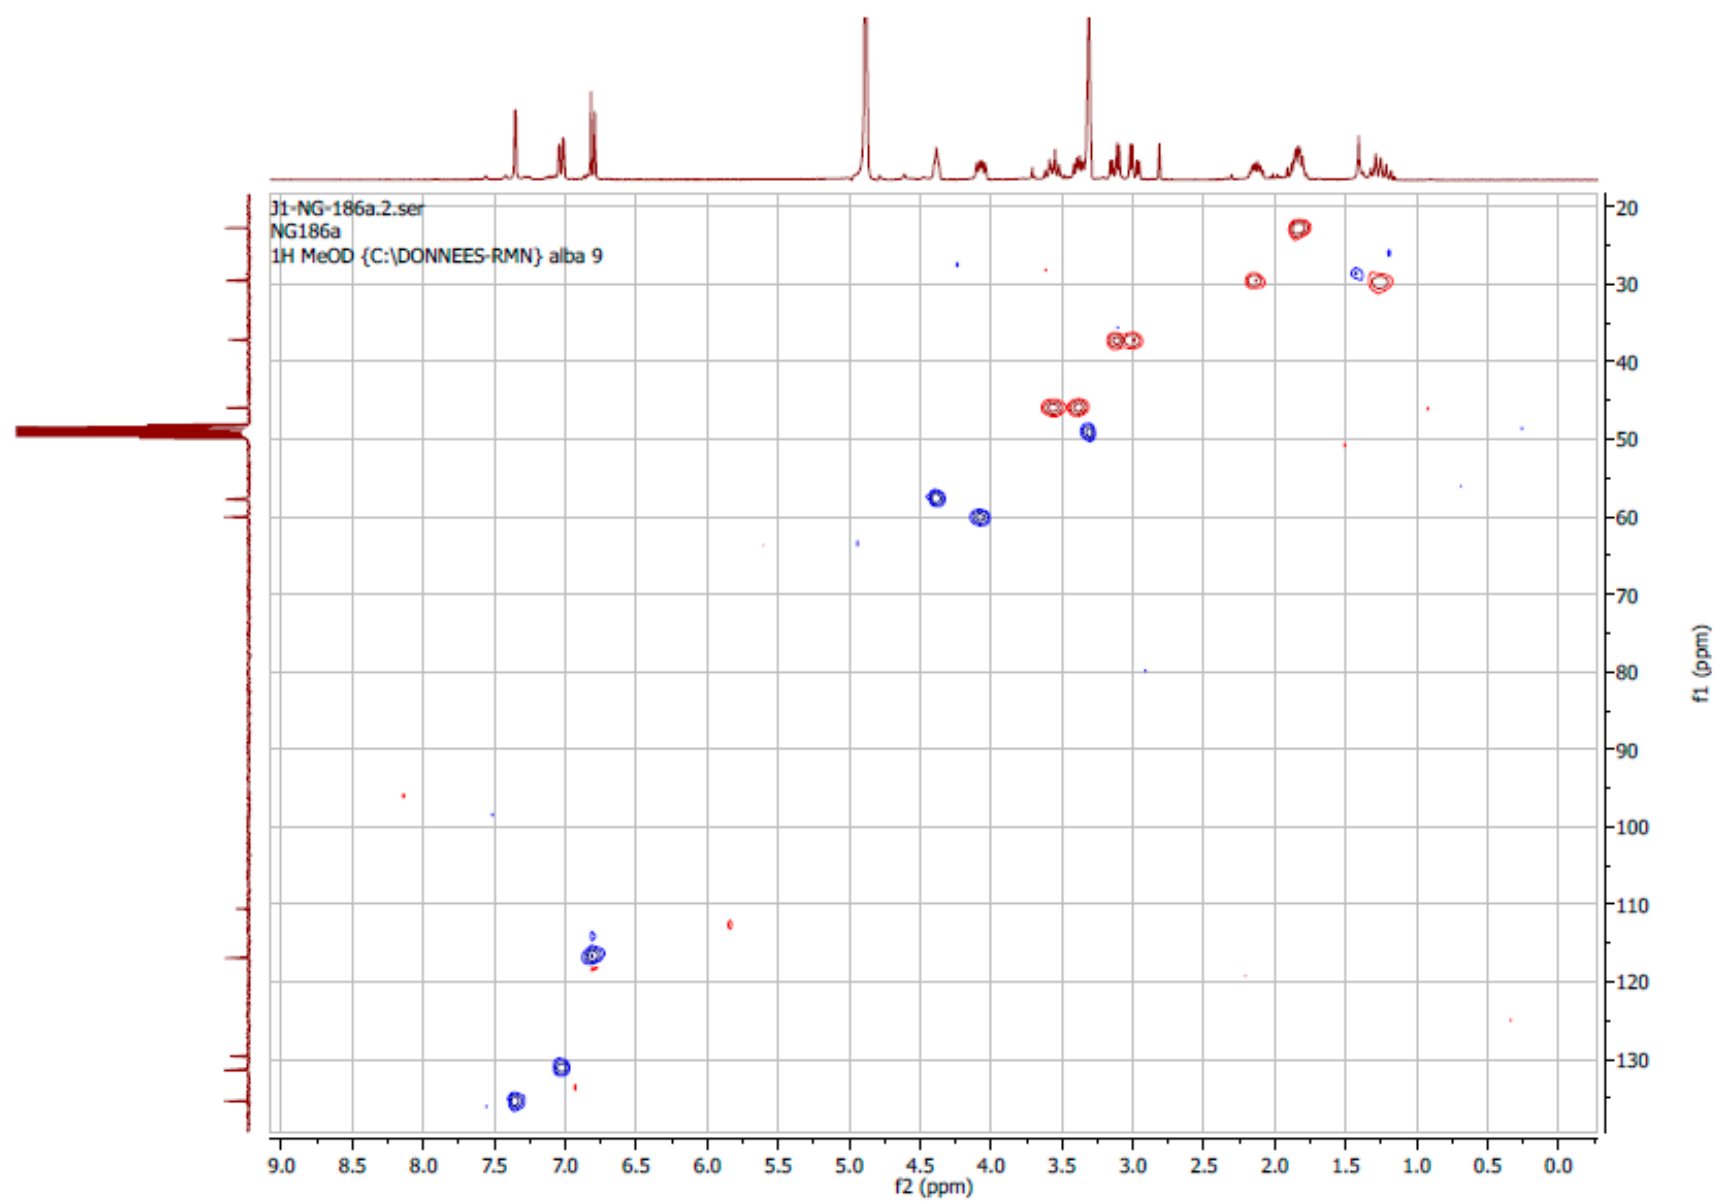

Figure S14: HSQC spectrum of compound 7 in  $\text{CD}_3\text{OD}$ .

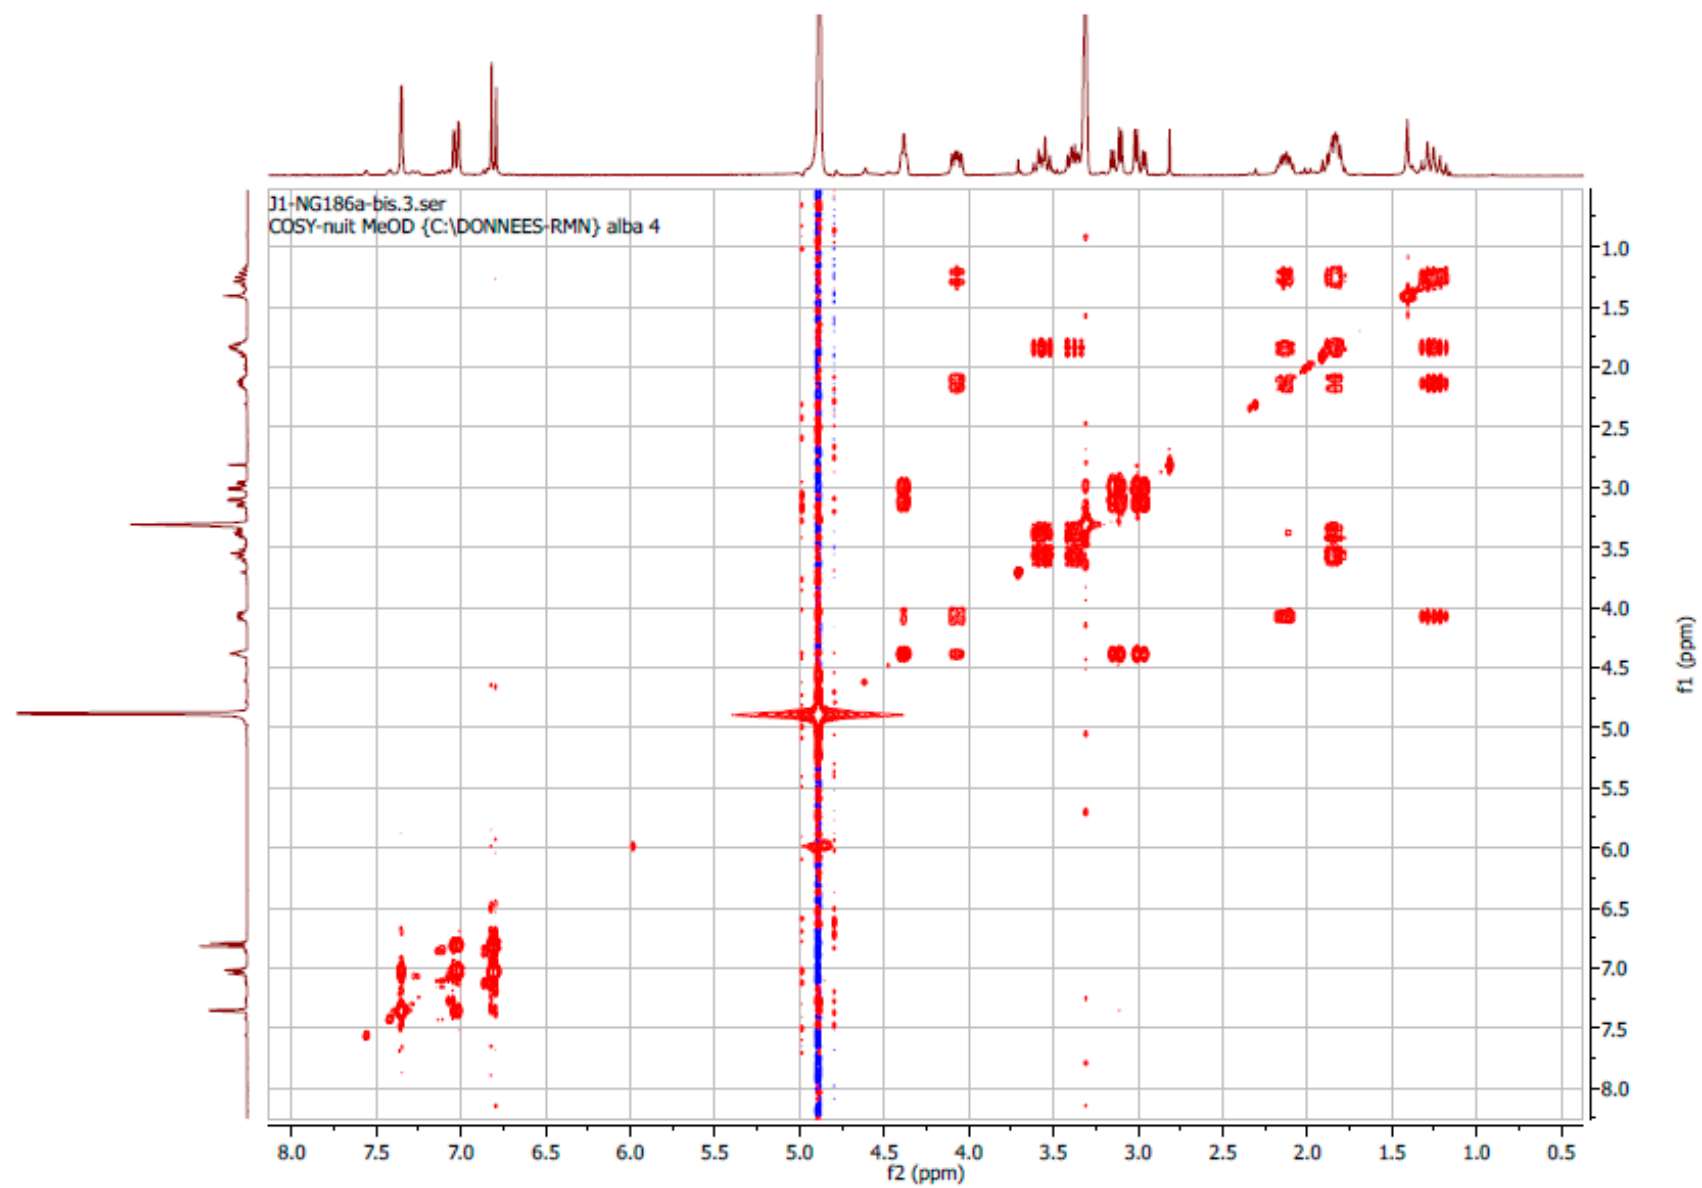

Figure S15: COSY spectrum of compound 7 in CD<sub>3</sub>OD.



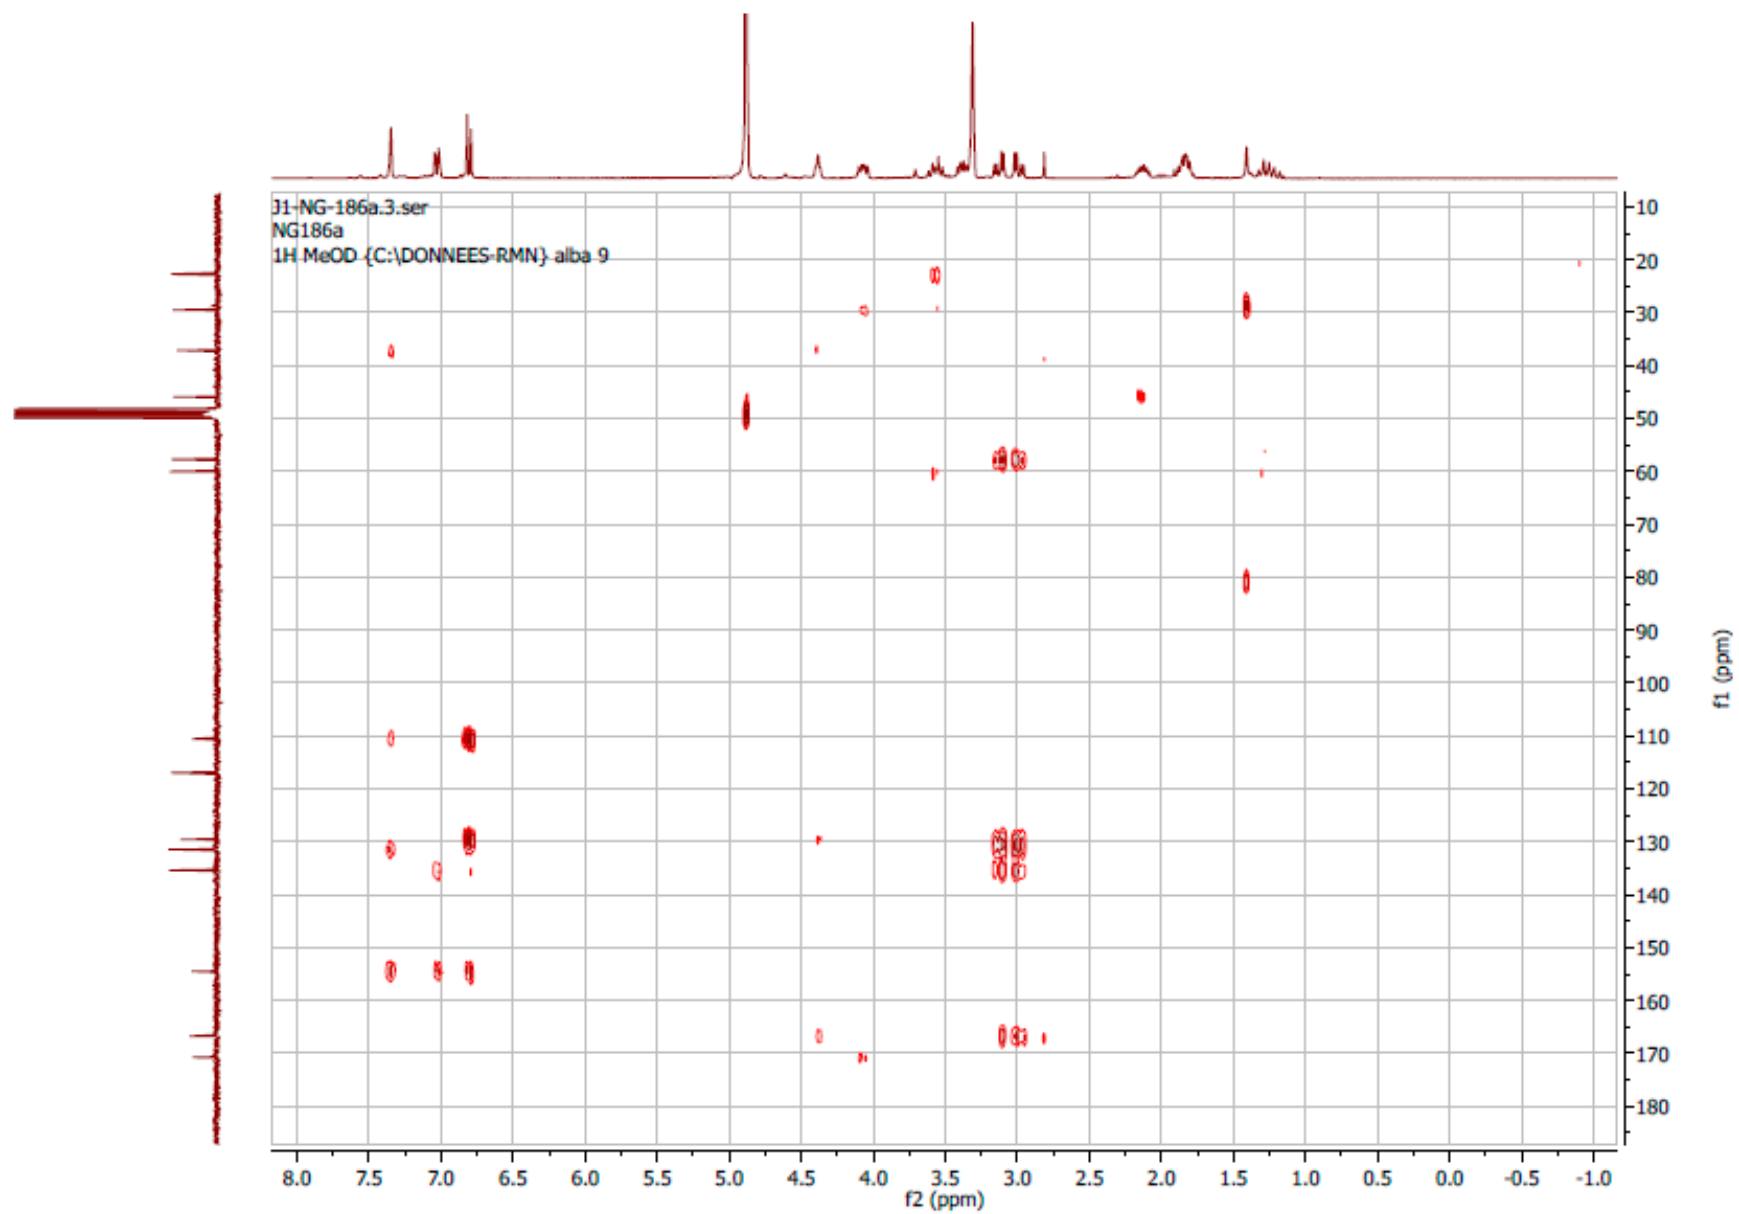

Figure S16: HMBC spectrum of compound 7 in CD<sub>3</sub>OD.

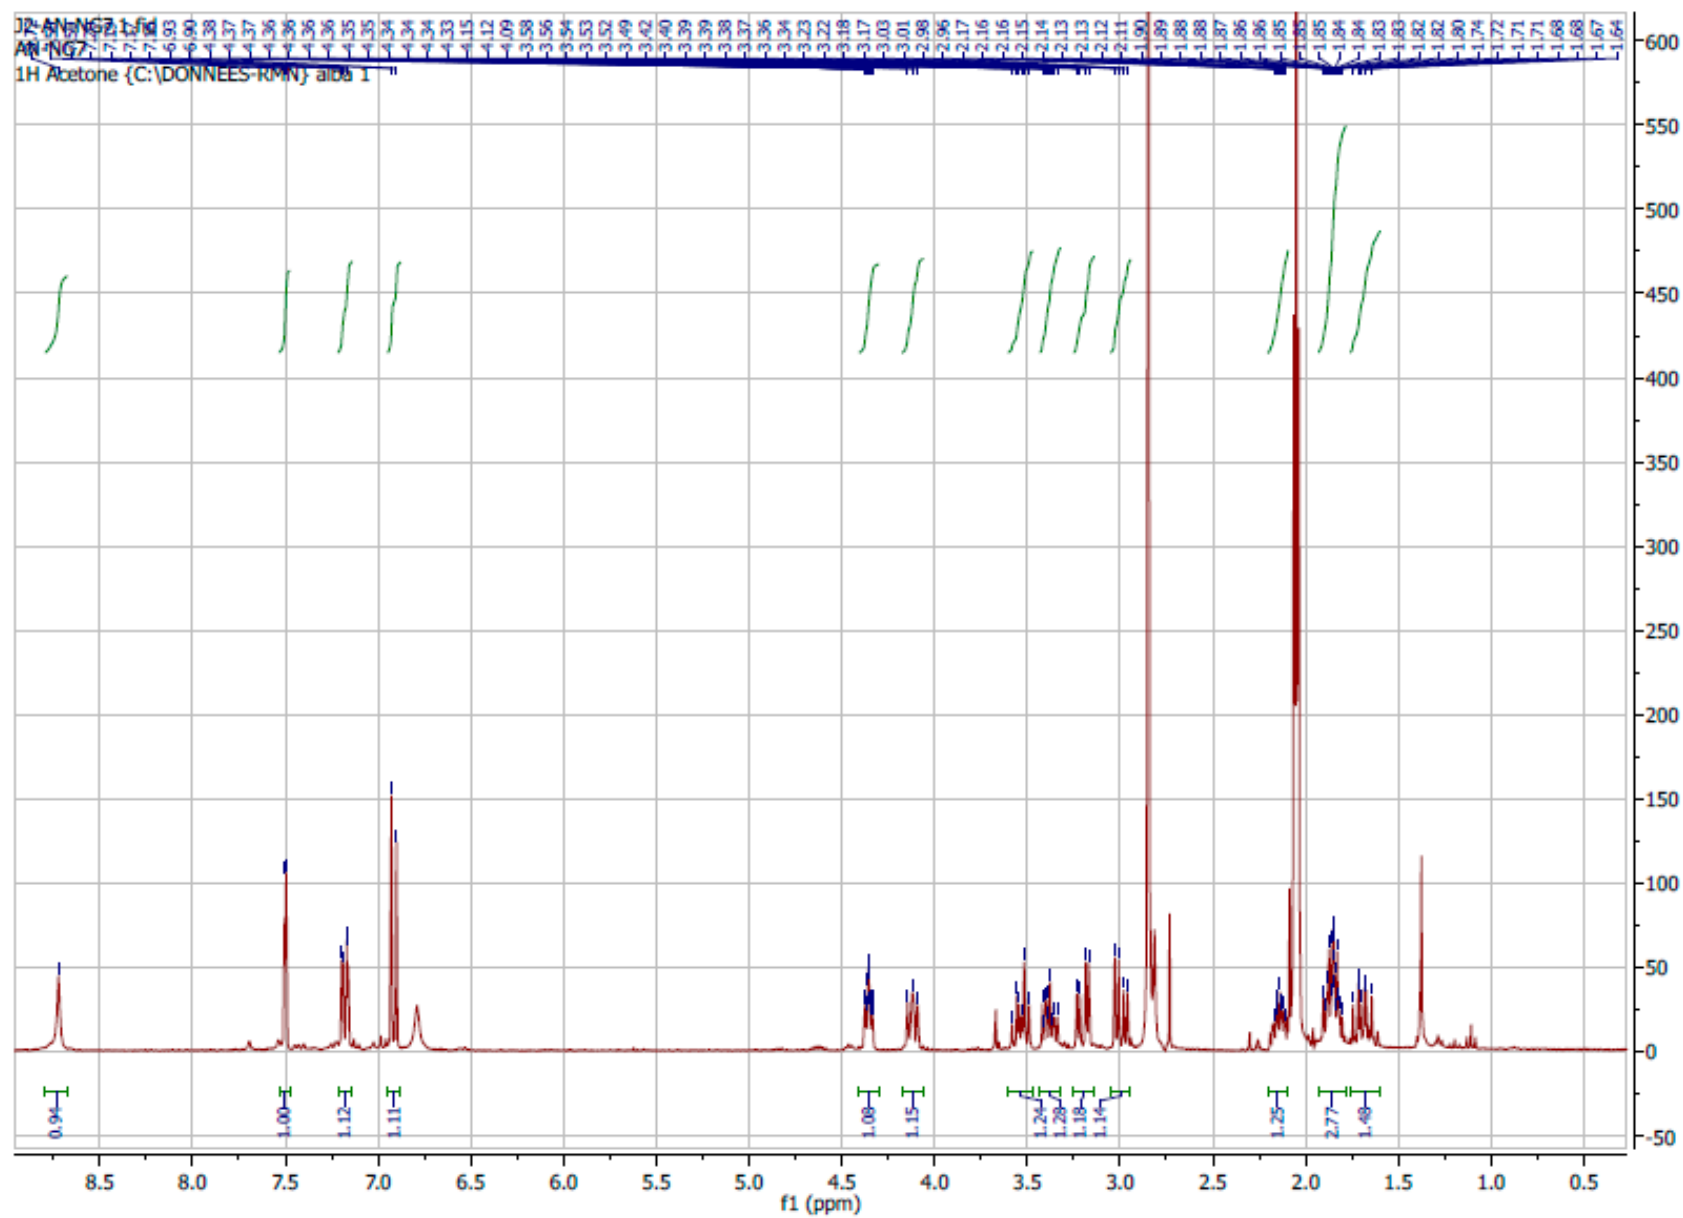

Figure S17:  $^1\text{H}$ -NMR spectrum of compound 7 in acetone- $d_6$ .

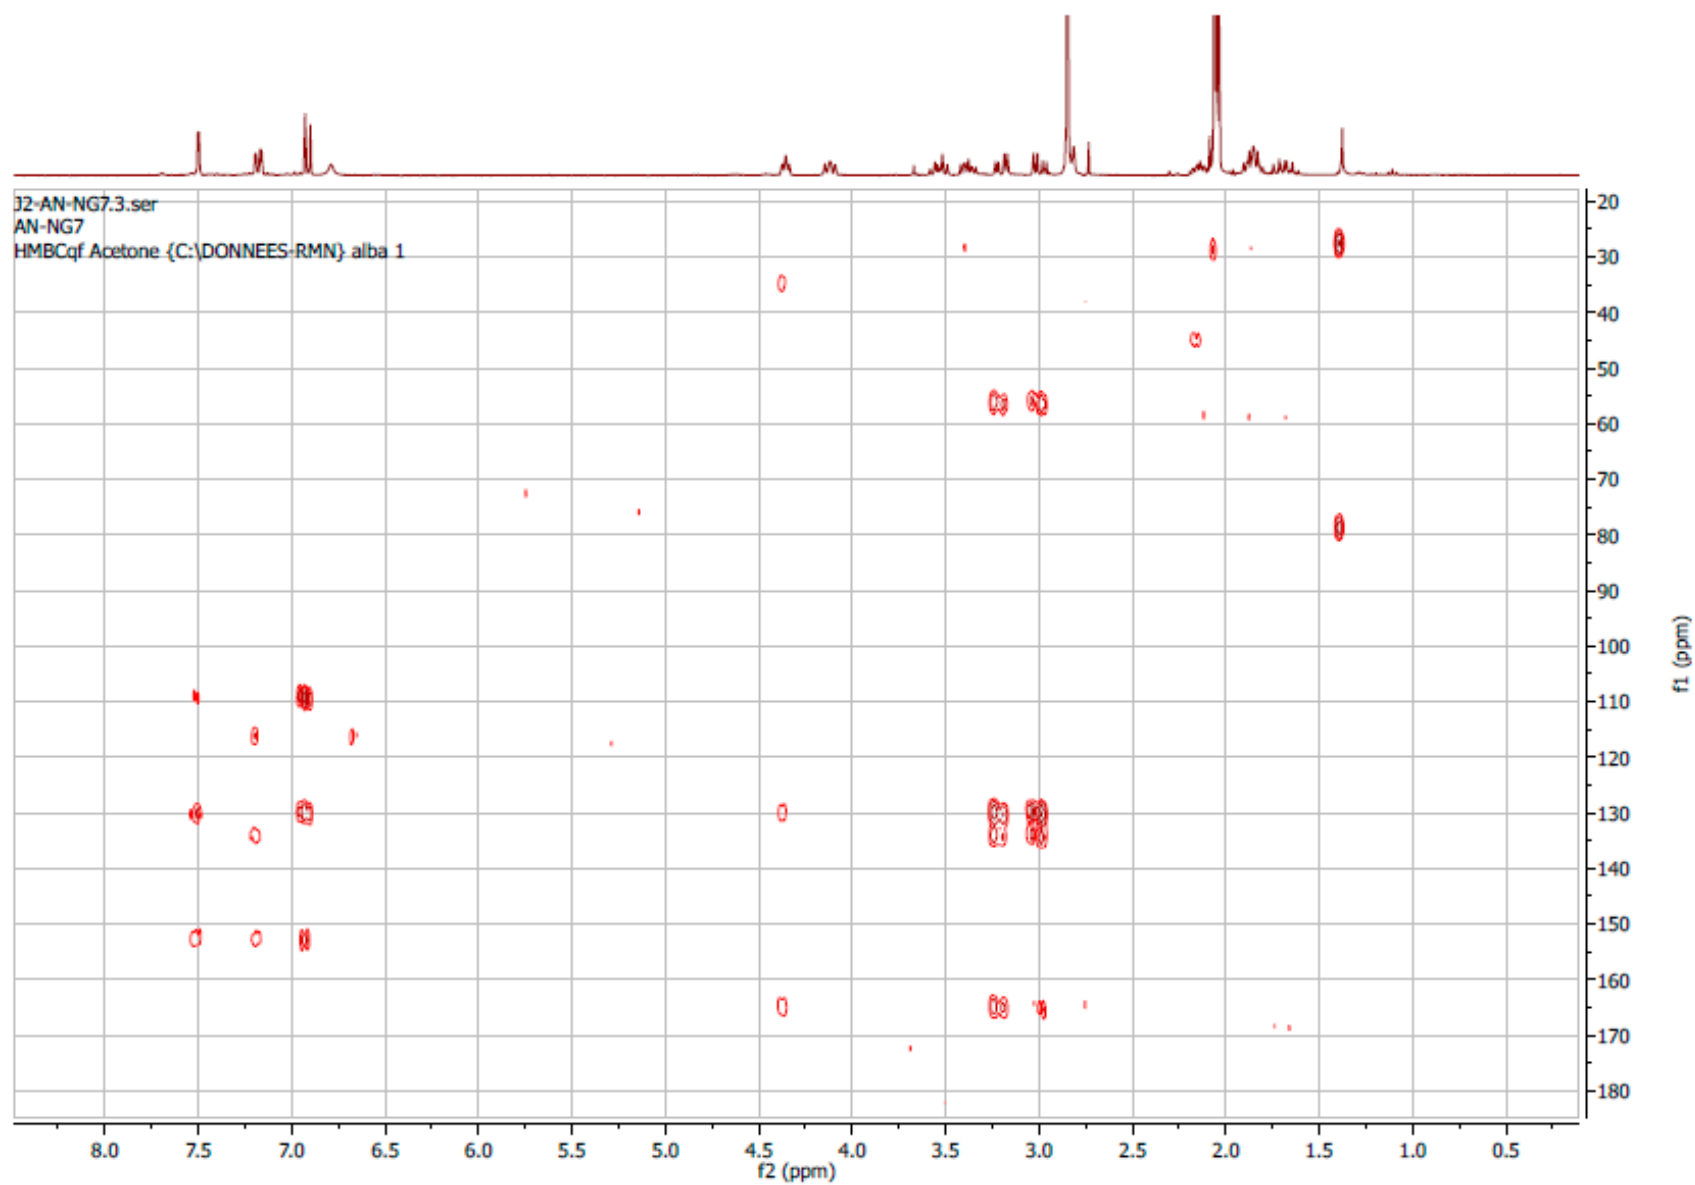

Figure S18 : HMBC spectrum of compound 7 in acetone- $d_6$ .

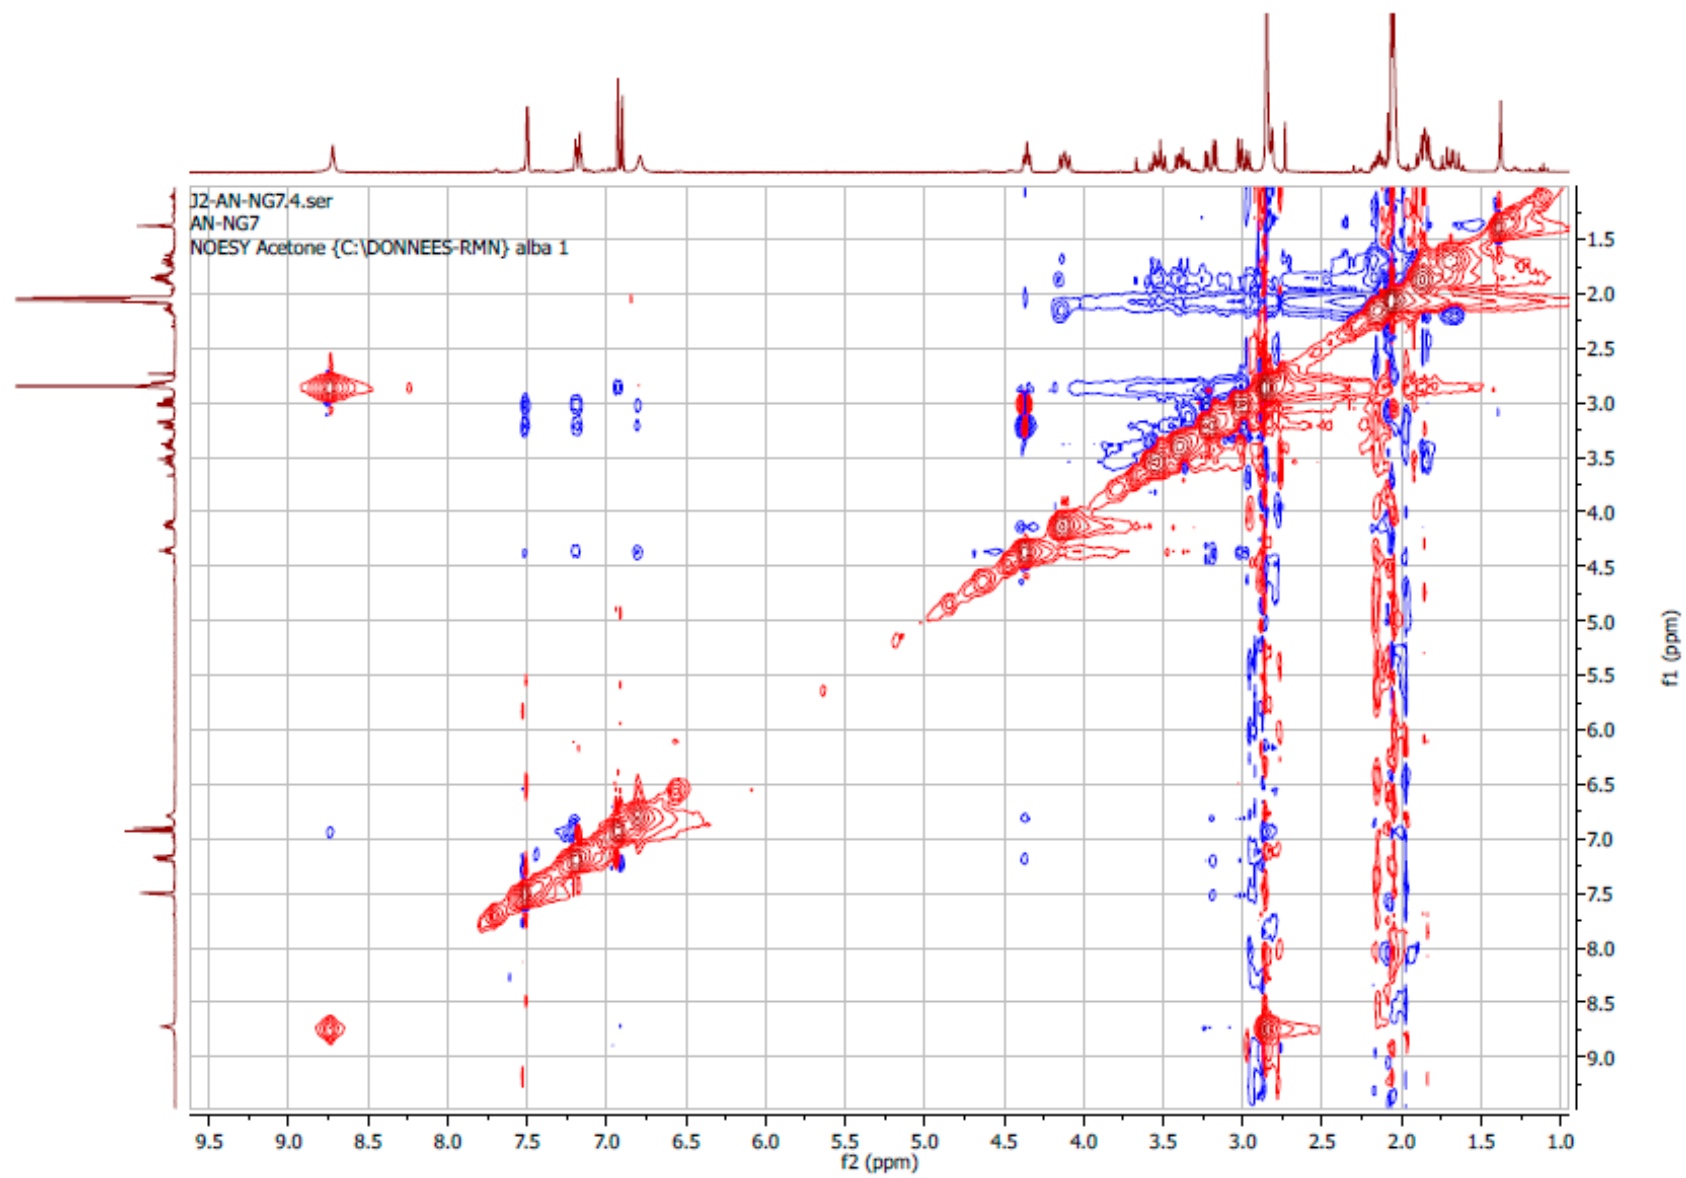

Figure S19: NOESY spectrum of compound 7 in acetone- $d_6$ .

S20

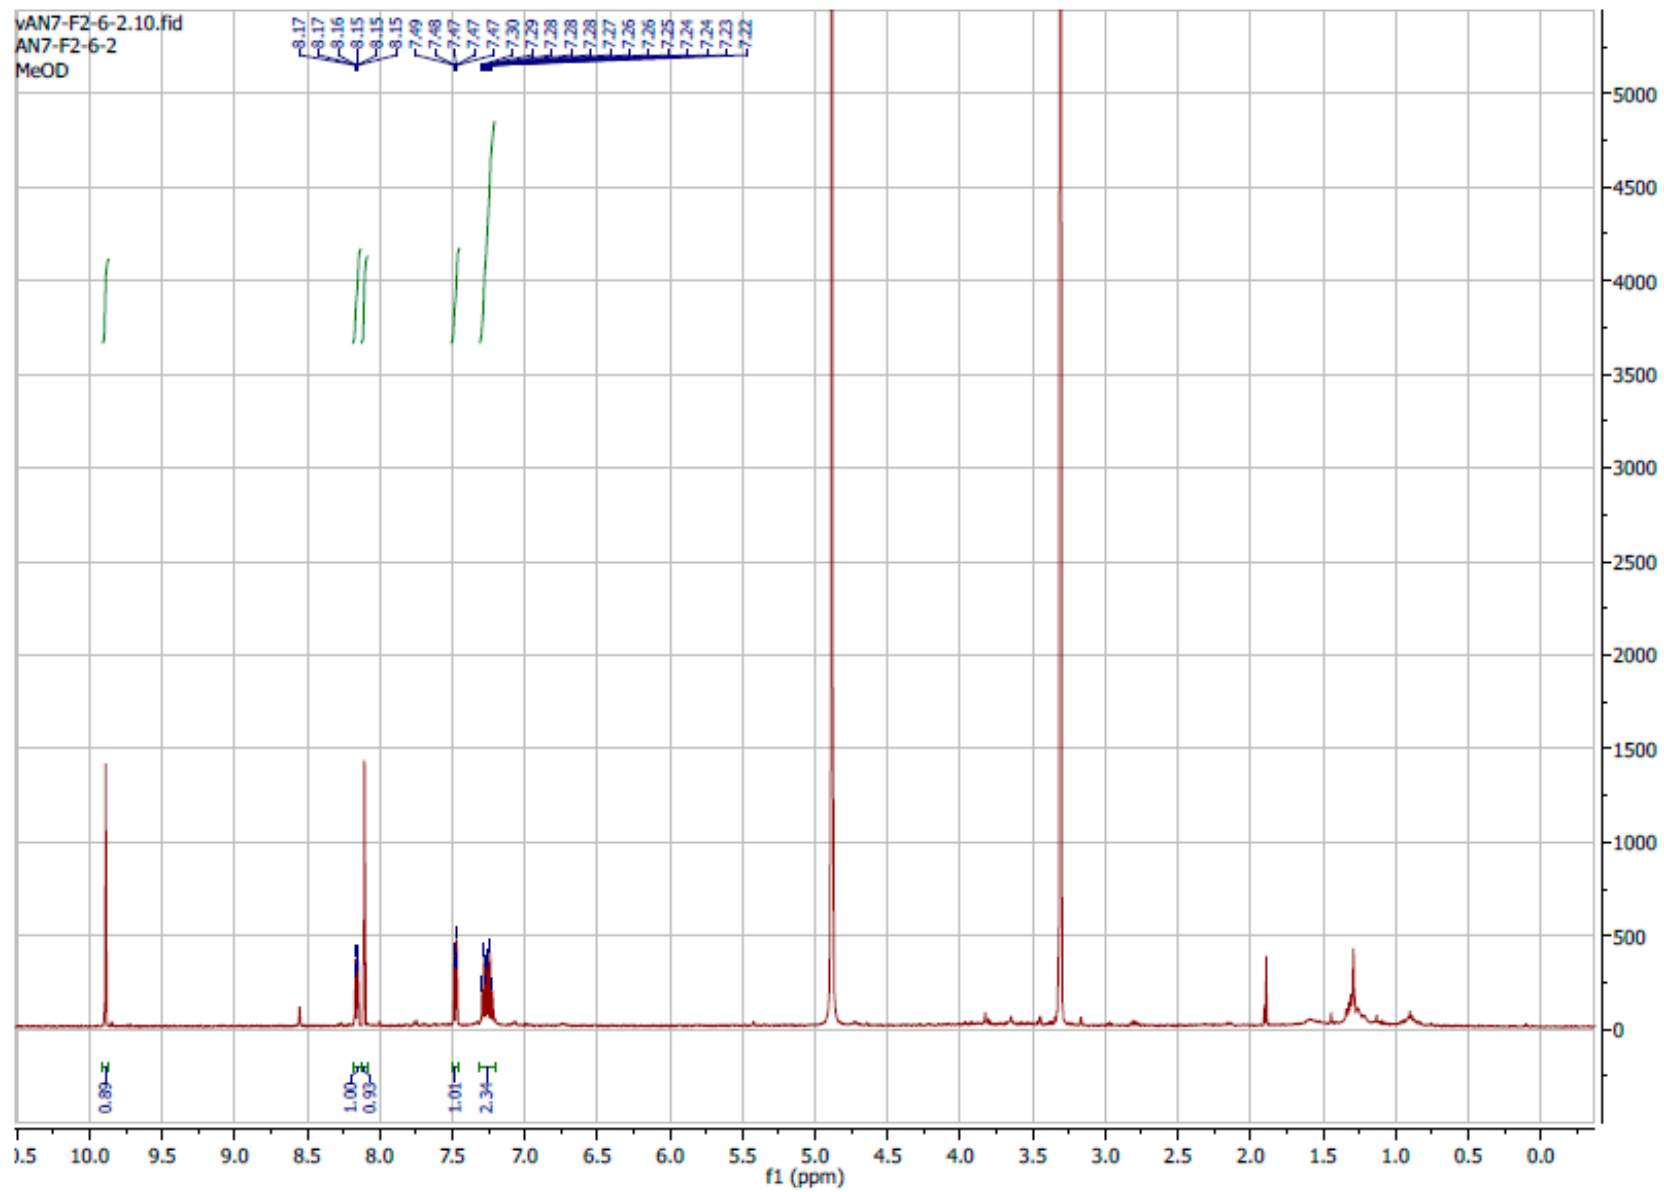

Figure S20: <sup>1</sup>H-NMR spectrum of compound 8 in CD<sub>3</sub>OD.

S21

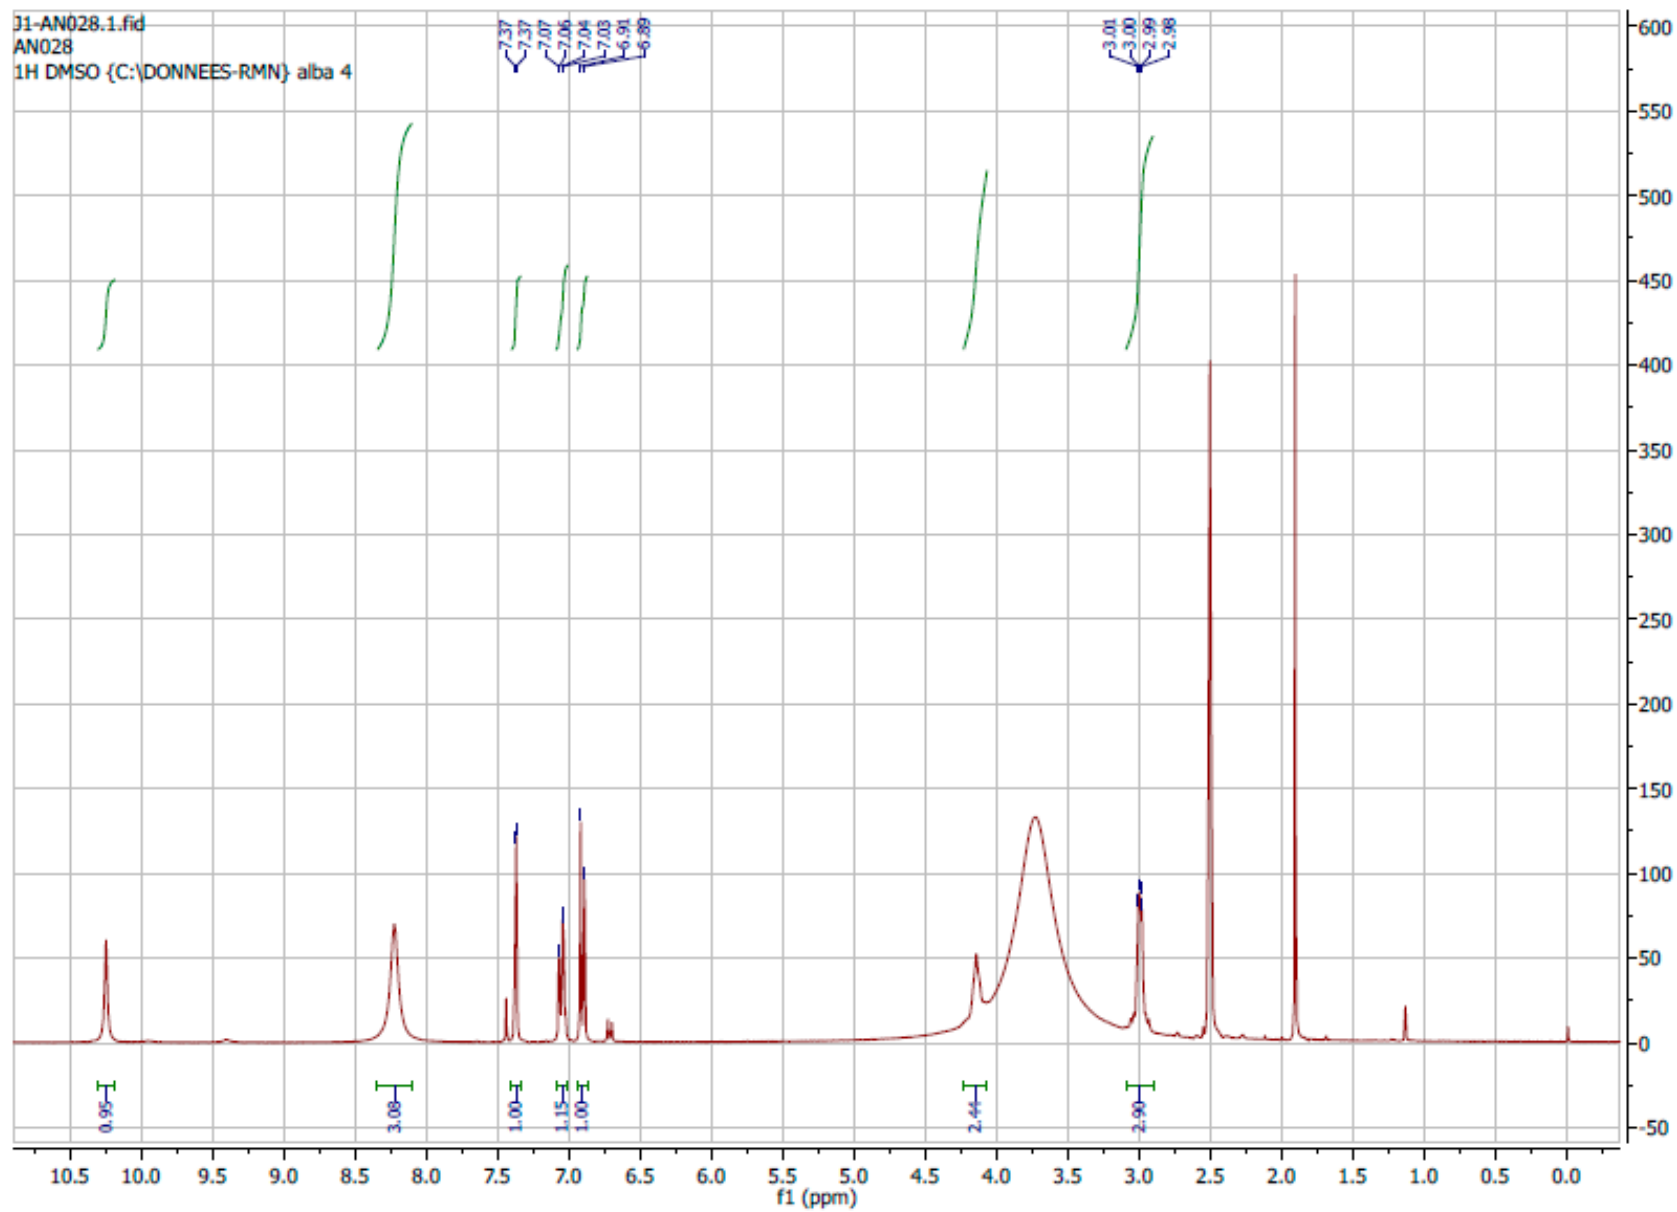

Figure S21:  $^1\text{H-NMR}$  spectrum of compound **10** in  $\text{DMSO-d}_6$ .

S22

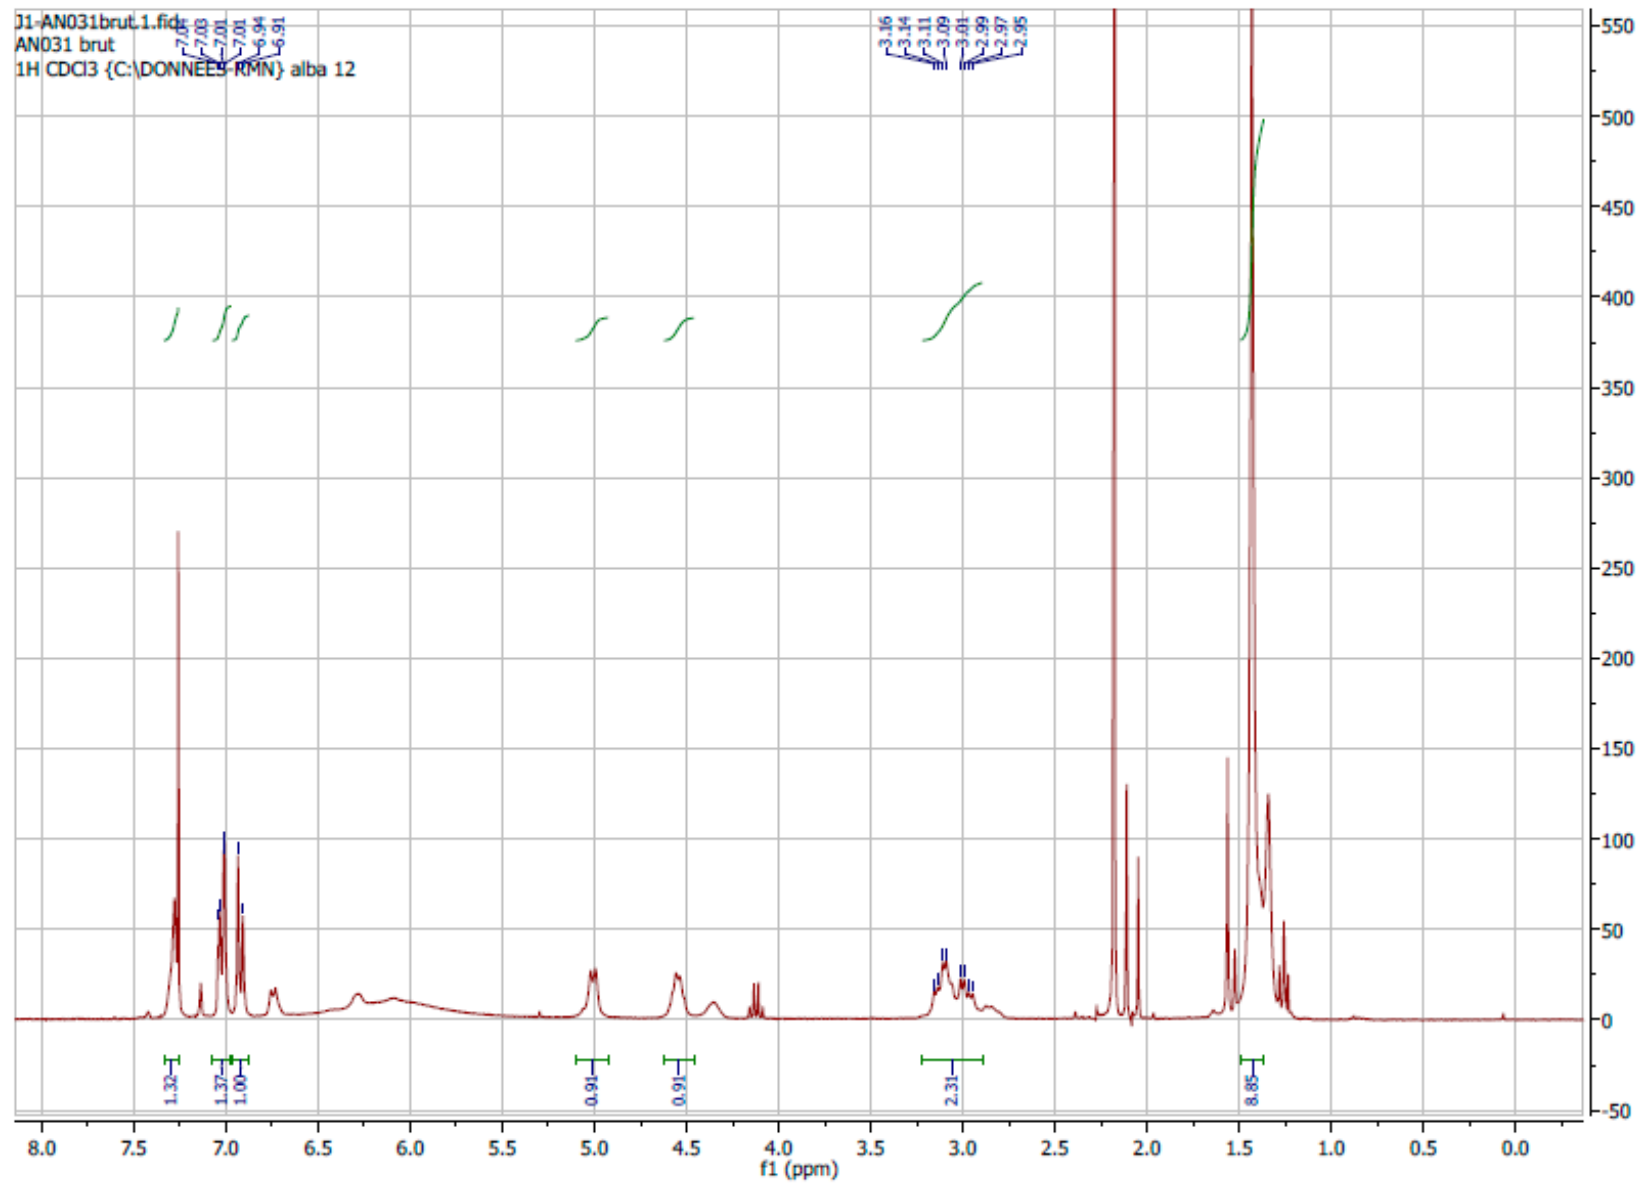

Figure S22:  $^1\text{H-NMR}$  spectrum of compound **11** in  $\text{CDCl}_3$ .

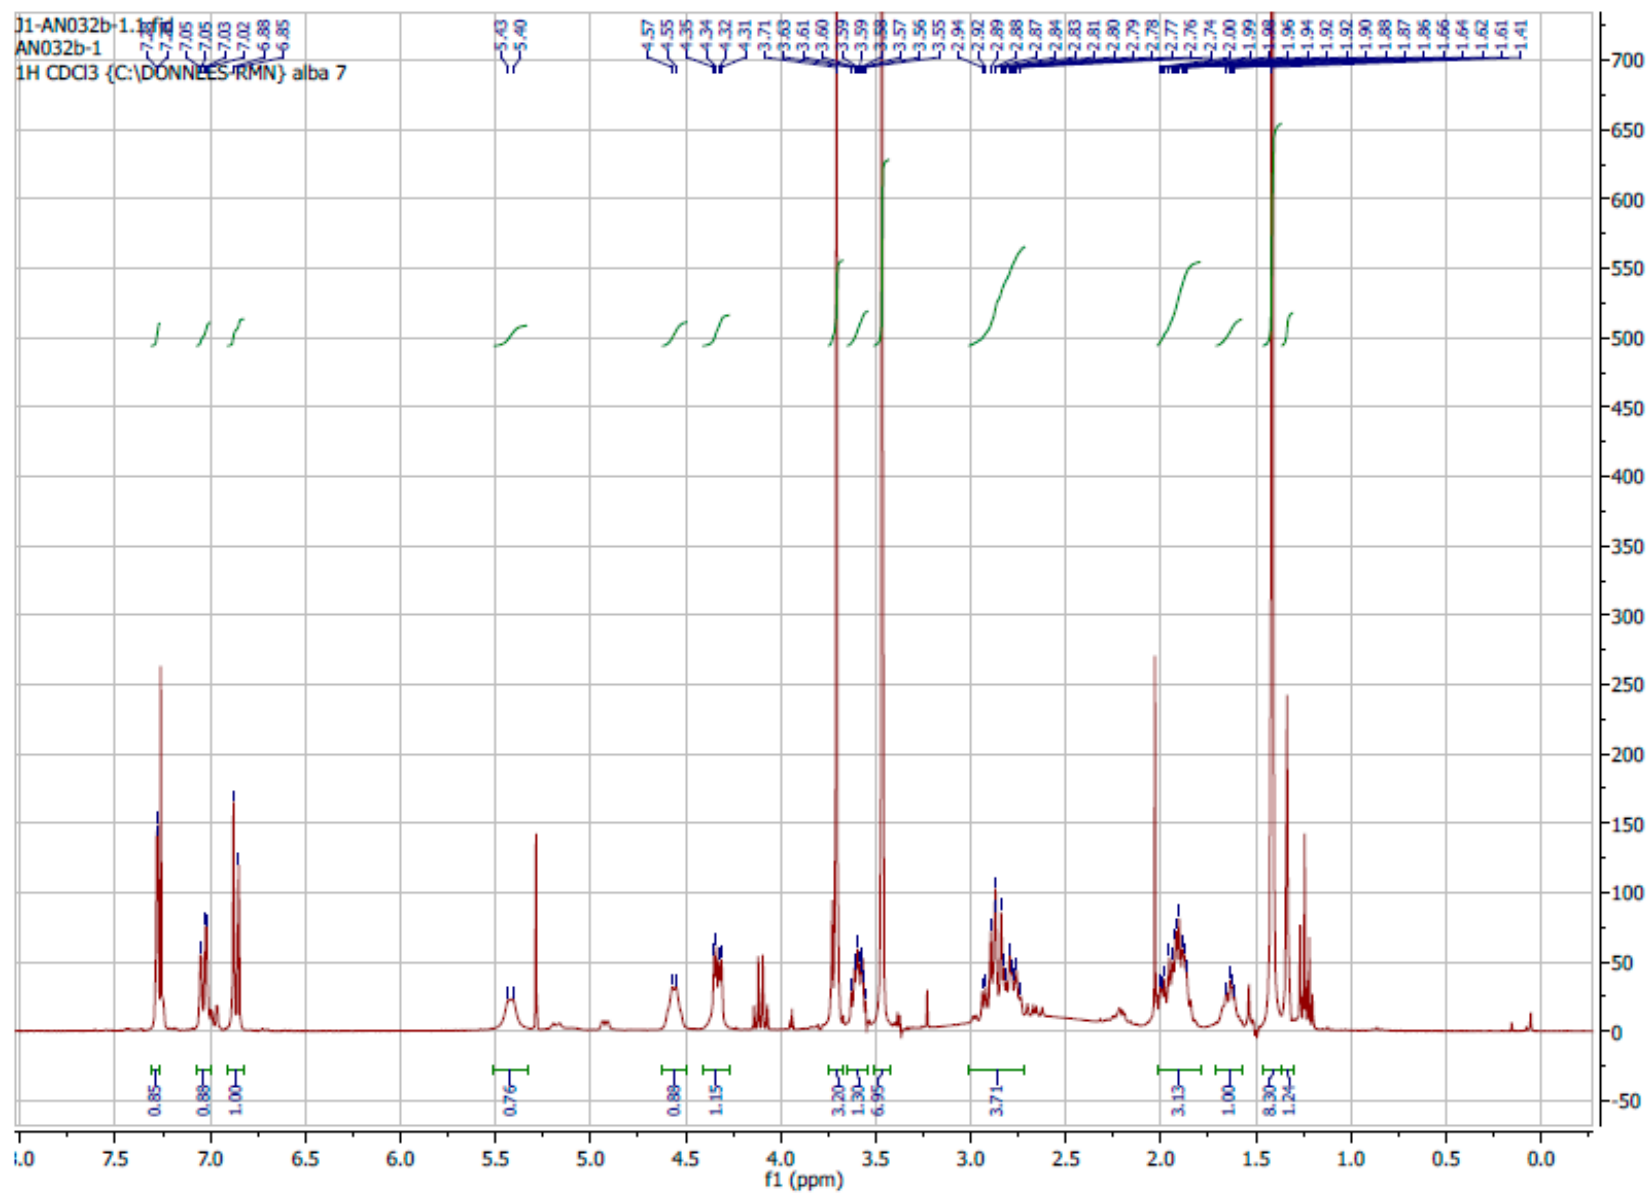

Figure S23: <sup>1</sup>H-NMR spectrum of compound 13a in CDCl<sub>3</sub>.



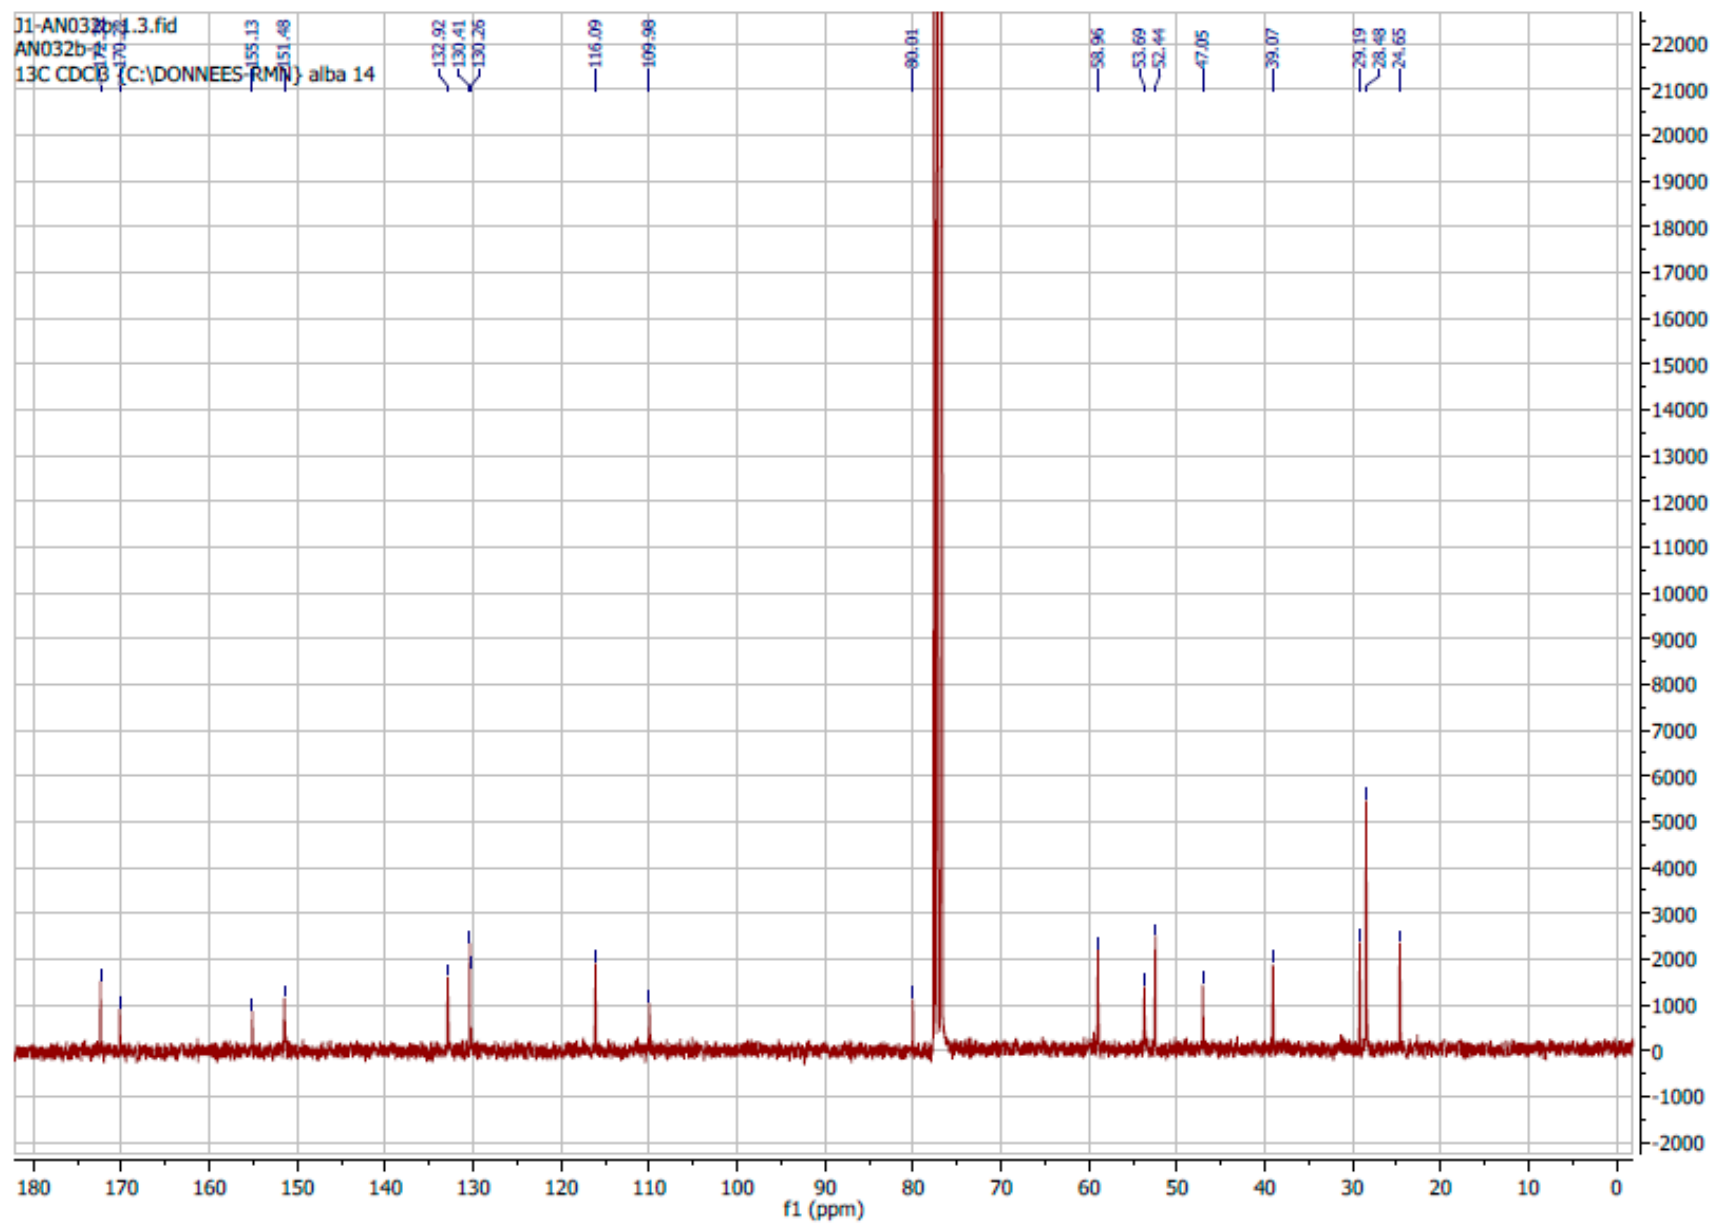

Figure S24:  $^{13}\text{C}$ -NMR spectrum of compound **13a** in  $\text{CDCl}_3$ .

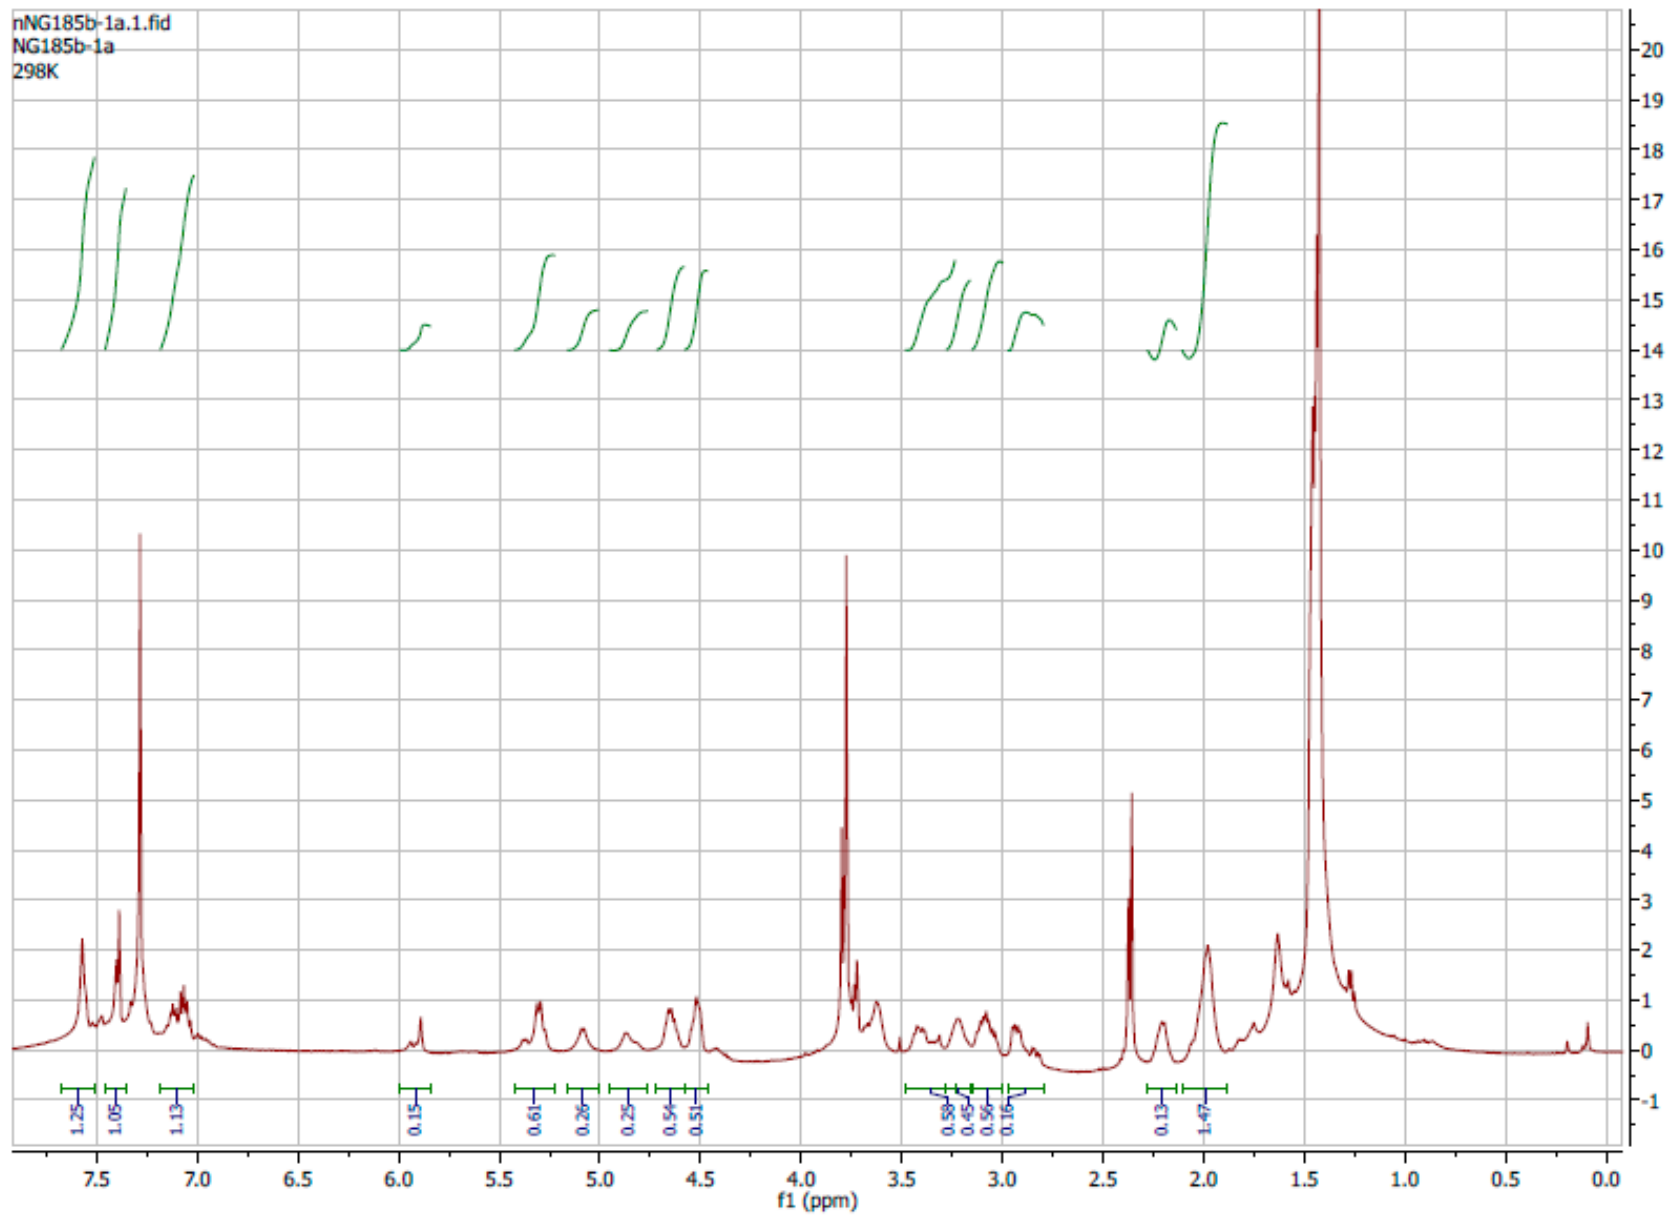

Figure S25:  $^1\text{H}$ -NMR spectrum of compound **13b** in  $\text{CDCl}_3$ .

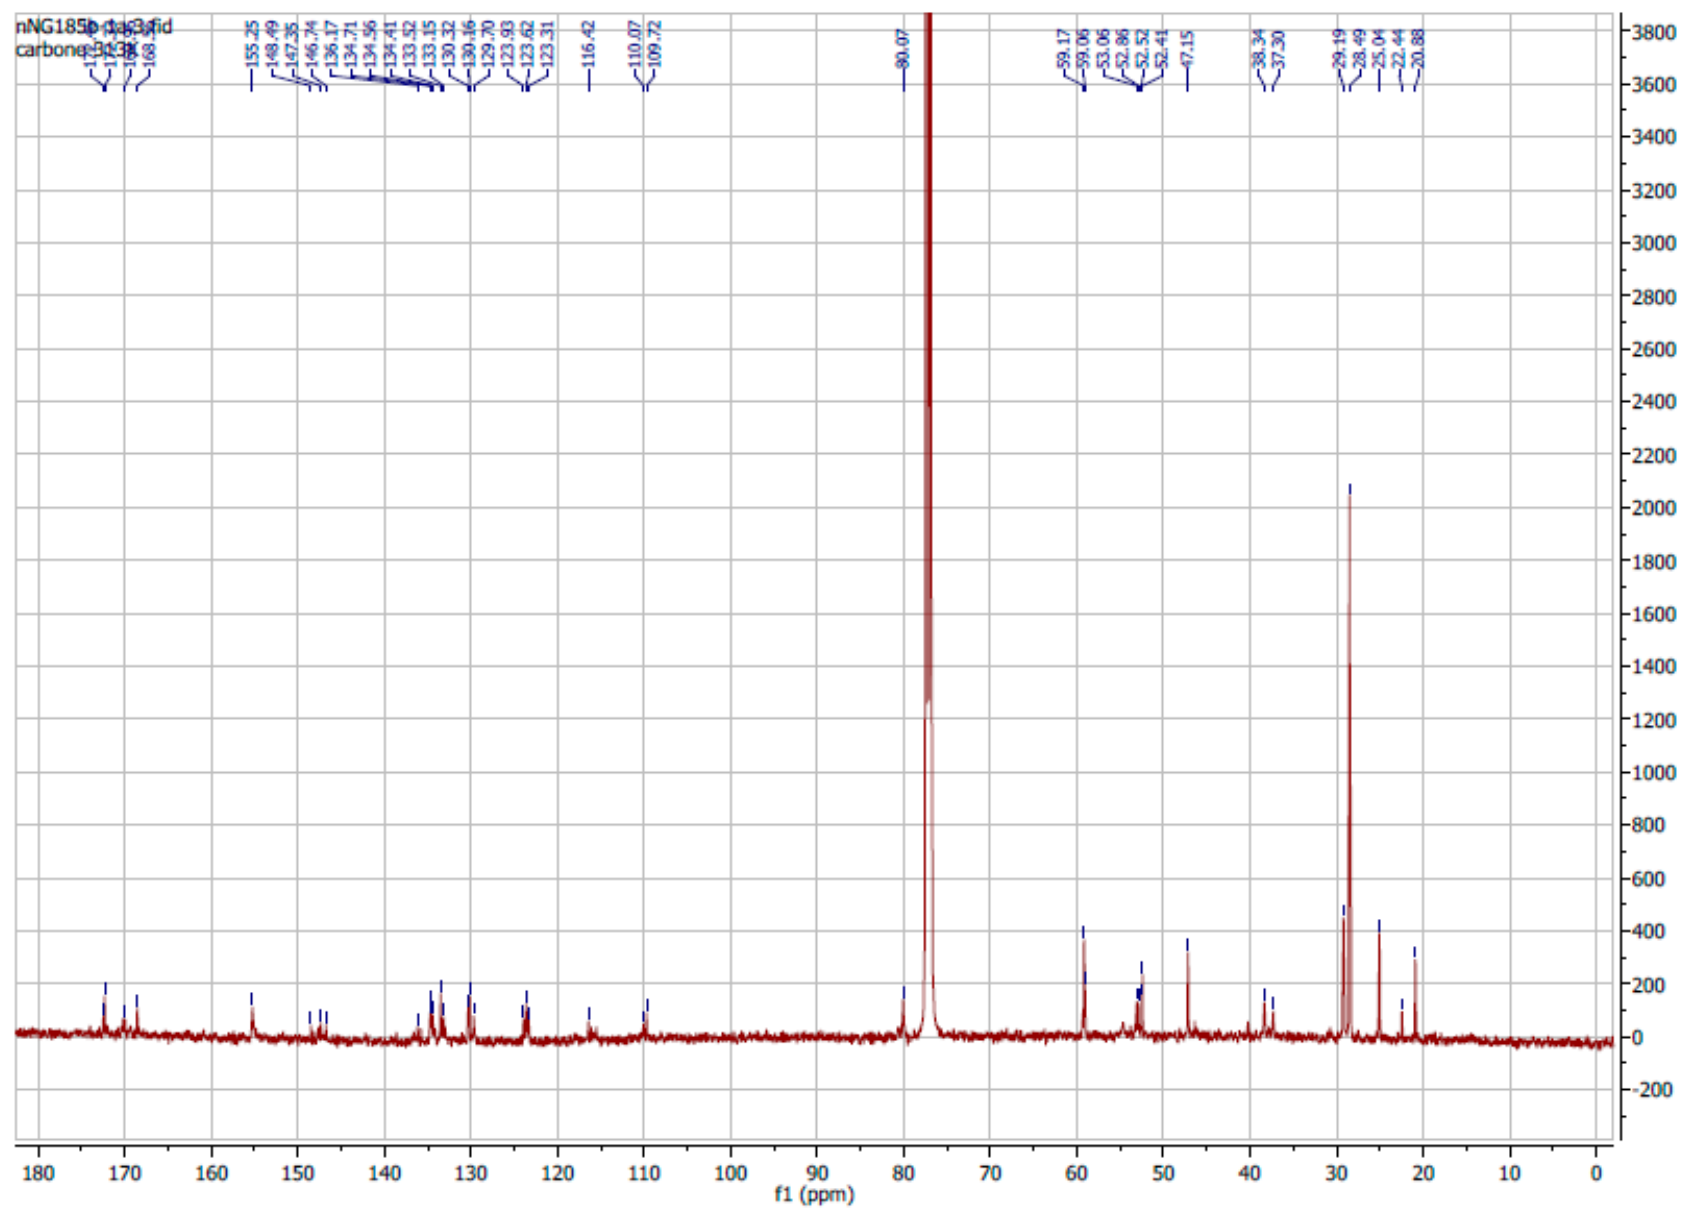

Figure S26:  $^{13}\text{C}$ -NMR spectrum of compound **13b** in  $\text{CDCl}_3$ .

S27

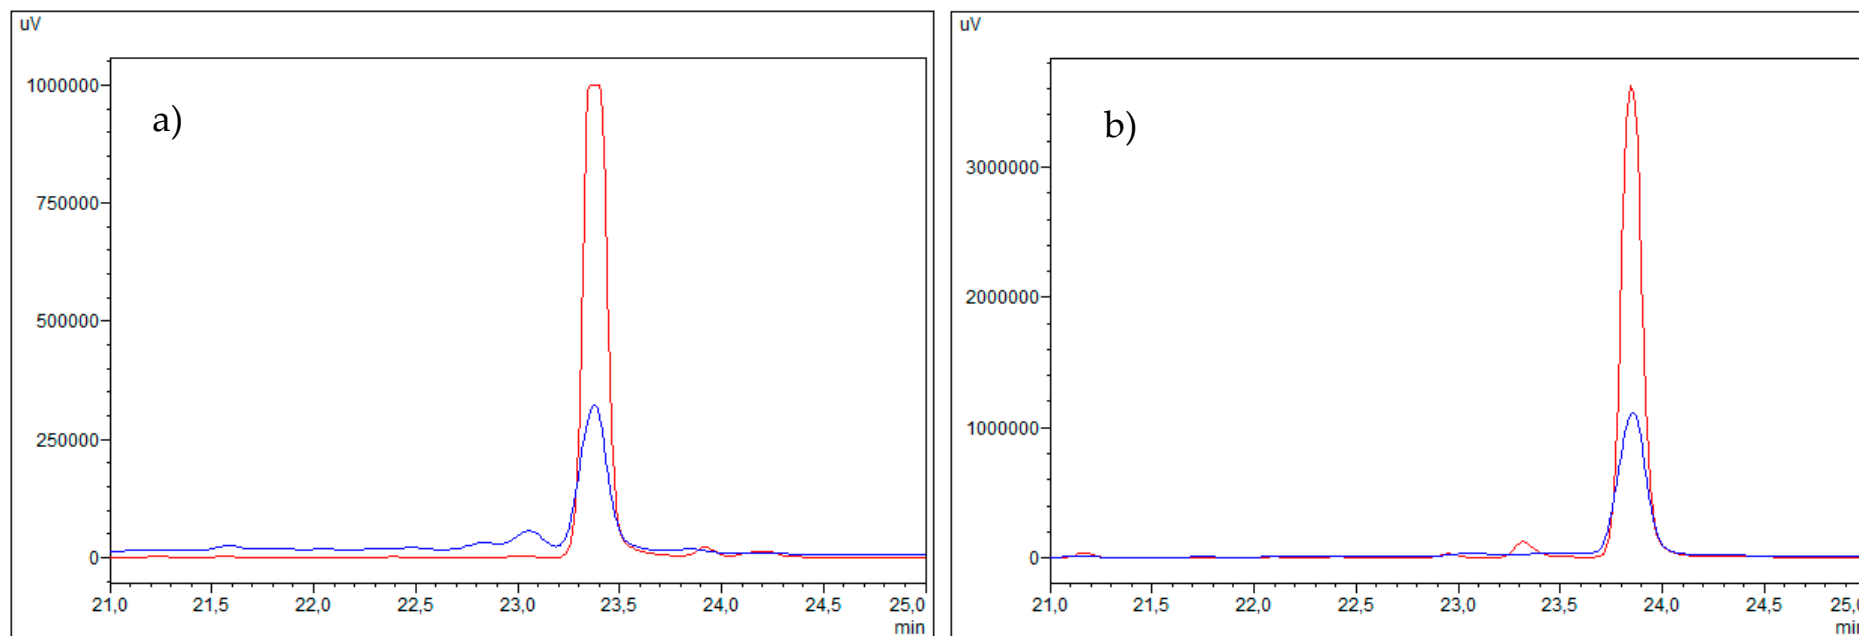

Figure S27: HPLC chromatogram at 220 nm of isolated (blue) and synthetic (red) compounds 6 (a) and 7 (b).
